# Supplementary material for: Research on Crystal Structure and Fungicidal Activity of the Amide Derivatives Based on the Natural Products Sinapic Acid and Mycophenolic Acid
Source: Hindawi journal article supplement (doi:10.1155/2021/1036199), 2021-12-21
Supplement: f1 [file 1036199.f1.doc]

**Supporting Information**

**Research on Crystal Structure and Fungicidal Activity of the Amide Derivatives Based on the Natural Products Sinapic Acid and Mycophenolic Acid**

Zhanfang Chen,a Hongbin Fang,a Xuewen Hua,a,* Wenrui Liu,a Yi Liu,a Chenmeng Xue,a Bingxiang Wang,b,* Dzmitry Bazhanau,a Xiaohe Zhu,a Man Yuan,a Jing Ru,c Pengfei Chu a,*

a (*College of Agriculture, Liaocheng University, Liaocheng 252000, China*)

b (*College of Pharmacy, Liaocheng University, Liaocheng 252000, China)*

c (*College of Chemistry and Chemical Engineering, Liaocheng University, Liaocheng 252000, China*)

* Address correspondence to author at College of Agriculture, Liaocheng University, No. 1, Hu’nan Road, Dongchangfu District, Liaocheng 252000, China (Tel: 0086-06358239295; E-mail: huaxuewen906@163.com, wangbingxiang@lcu.edu.cn, chupengfei@lcu.edu.cn)

**Contents:**

**Part 1** X-ray crystal data of the compounds **I-4** and **II-5**

**Part 2** 1H-NMR, 13C-NMR and HRMS spectra of the target compounds

**Part 1** X-ray crystal data of the compounds **I-4** and **II-5**

**Table S1** Crystal data and structure refinement for **I-4**

| Empirical formula | C21H25NO7 |  |
| --- | --- | --- |
| Formula weight | 403.42 |  |
| Temperature | 298(2) K |  |
| Wavelength | 0.71073 Å |  |
| Crystal system | Monoclinic |  |
| Space group | C 2/c |  |
| Unit cell dimensions | a = 28.208(3) Å | = 90° |
|  | b = 11.1670(12) Å | = 114.242(4)° |
|  | c = 14.0948(14) Å |  = 90° |
| Volume | 4048.3(7) Å3 |  |
| Z | 8 |  |
| Density (calculated) | 1.324 Mg/m3 |  |
| Absorption coefficient | 0.100 mm-1 |  |
| F(000) | 1712 |  |
| Crystal size | 0.430 x 0.400 x 0.350 mm3 |  |
| Theta range for data collection | 2.331 to 25.020°. |  |
| Index ranges | -29<=h<=33, -13<=k<=13, -16<=l<=16 |  |
| Reflections collected | 9895 |  |
| Independent reflections | 3575 [R(int) = 0.0517] |  |
| Completeness to theta = 25.020° | 99.8 % |  |
| Absorption correction | Semi-empirical from equivalents |  |
| Max. and min. transmission | 0.9660 and 0.9584 |  |
| Refinement method | Full-matrix least-squares on F2 |  |
| Data / restraints / parameters | 3575 / 0 / 263 |  |
| Goodness-of-fit on F2 | 1.064 |  |
| Final R indices [I>2sigma(I)] | R1 = 0.0493, wR2 = 0.1153 |  |
| R indices (all data) | R1 = 0.0946, wR2 = 0.1337 |  |
| Extinction coefficient | 0.0216(9) |  |
| Largest diff. peak and hole | 0.313 and -0.270 e.Å-3 |  |

**Table S2** Crystal data and structure refinement for compound **II-5**

| Empirical formula | C28H33NO7 |  |
| --- | --- | --- |
| Formula weight | 495.55 |  |
| Temperature | 298(2) K |  |
| Wavelength | 0.71073 Å |  |
| Crystal system | Monoclinic |  |
| Space group | *P 21/n* |  |
| Unit cell dimensions | a = 15.3461(16) Å | = 90° |
|  | b = 10.3766(11) Å | = 95.683(2)° |
|  | c = 16.0494(17) Å |  = 90° |
| Volume | 2543.2(5) Å3 |  |
| Z | 4 |  |
| Density (calculated) | 1.294 Mg/m3 |  |
| Absorption coefficient | 0.093 mm-1 |  |
| F(000) | 1056 |  |
| Crystal size | 0.420 x 0.300 x 0.160 mm3 |  |
| Theta range for data collection | 2.341 to 25.019°. |  |
| Index ranges | -15<=h<=18, -12<=k<=12, -16<=l<=19 |  |
| Reflections collected | 11865 |  |
| Independent reflections | 4479 [R(int) = 0.0536] |  |
| Completeness to theta = 25.019° | 99.7 % |  |
| Absorption correction | Semi-empirical from equivalents |  |
| Max. and min. transmission | 0.9853 and 0.9621 |  |
| Refinement method | Full-matrix least-squares on F2 |  |
| Data / restraints / parameters | 4479 / 32 / 337 |  |
| Goodness-of-fit on F2 | 1.037 |  |
| Final R indices [I>2sigma(I)] | R1 = 0.0625, wR2 = 0.1565 |  |
| R indices (all data) | R1 = 0.1160, wR2 = 0.1841 |  |
| Extinction coefficient | 0.0041(13) |  |
| Largest diff. peak and hole | 0.193 and -0.189 e.Å-3 |  |

**Part 2** 1H-NMR, 13C-NMR and HRMS spectra of the target compounds

(*E*)-2,6-dimethoxy-4-(3-oxo-3-(phenylamino)prop-1-en-1-yl)phenyl acetate (**I-1**)


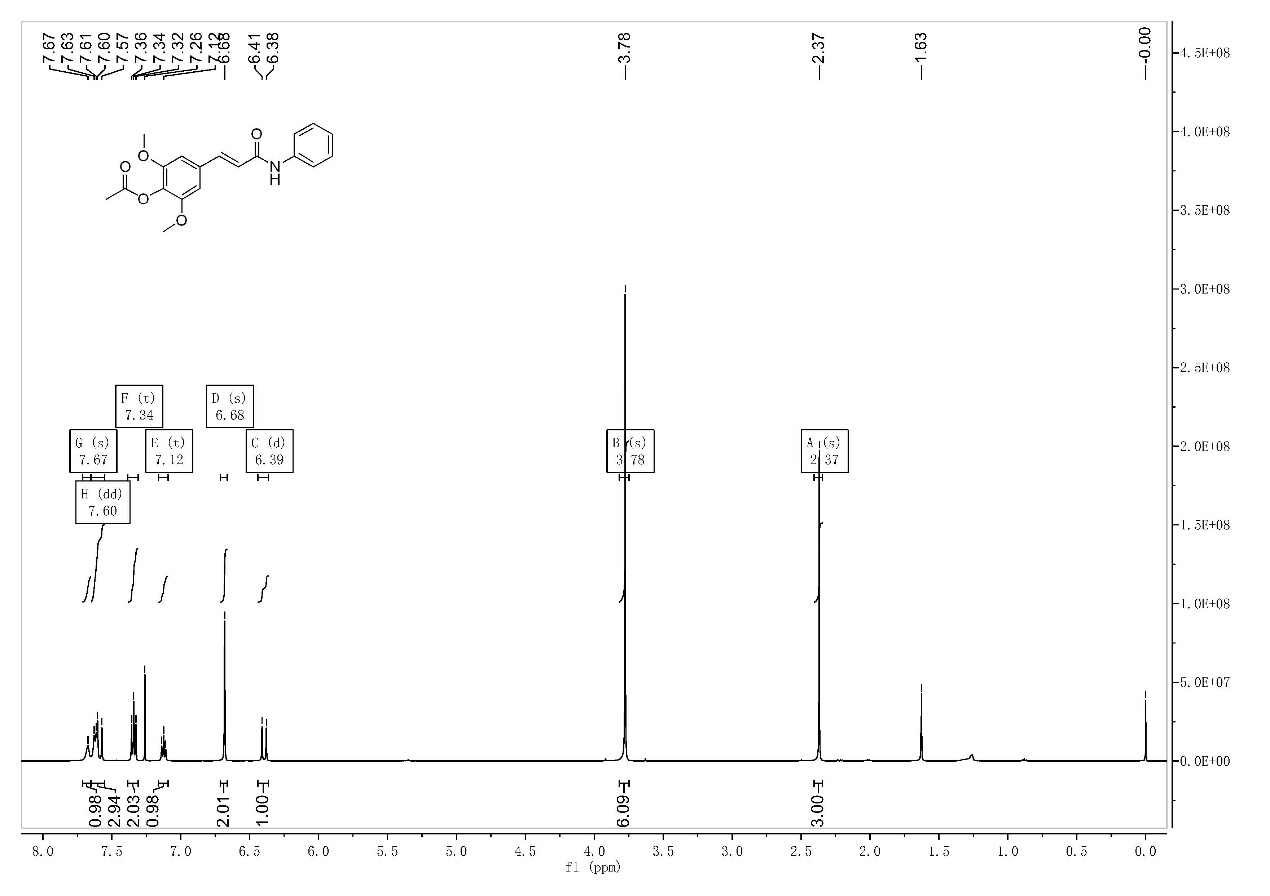


**S1-1** 1H-NMR of the compound **I-1**


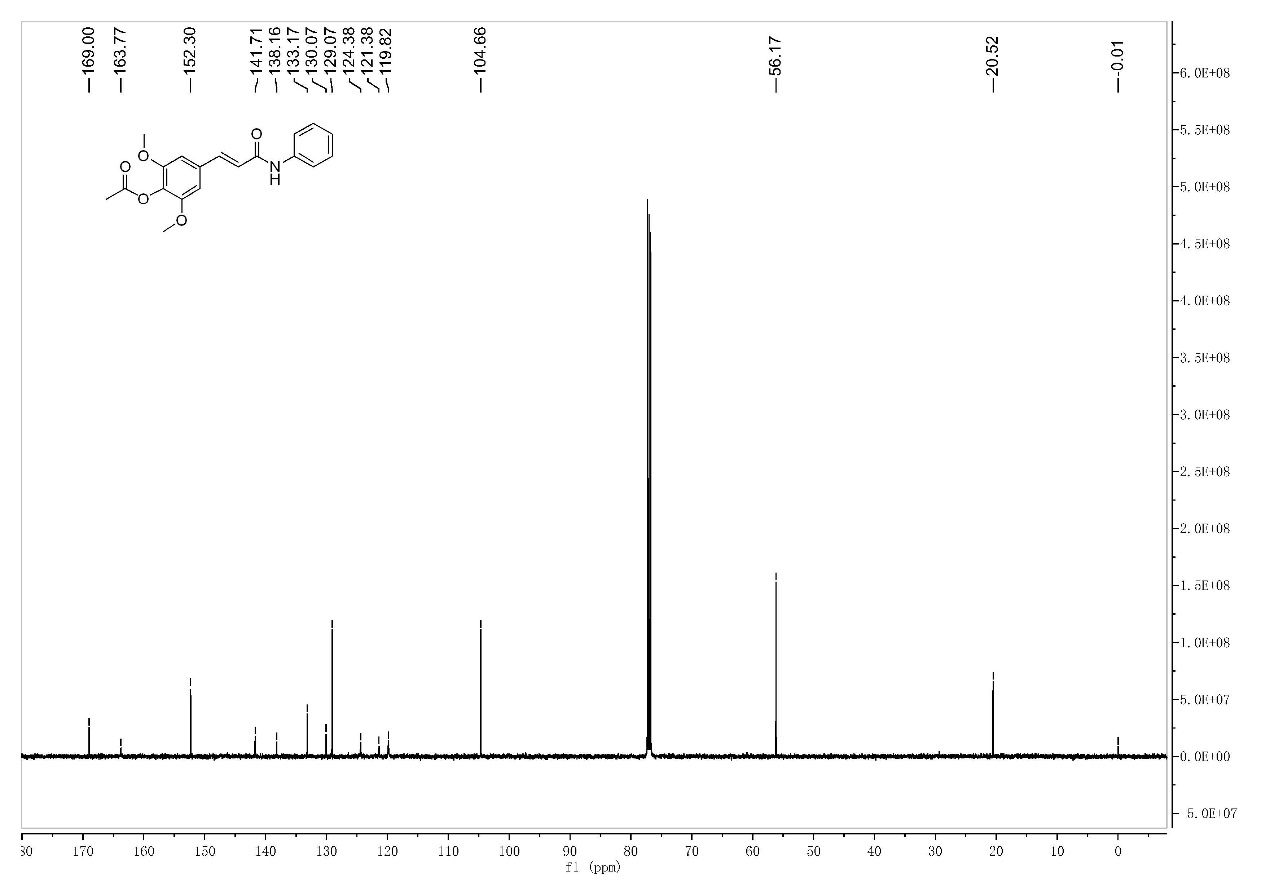


**S1-2** 13C-NMR of the compound **I-1**


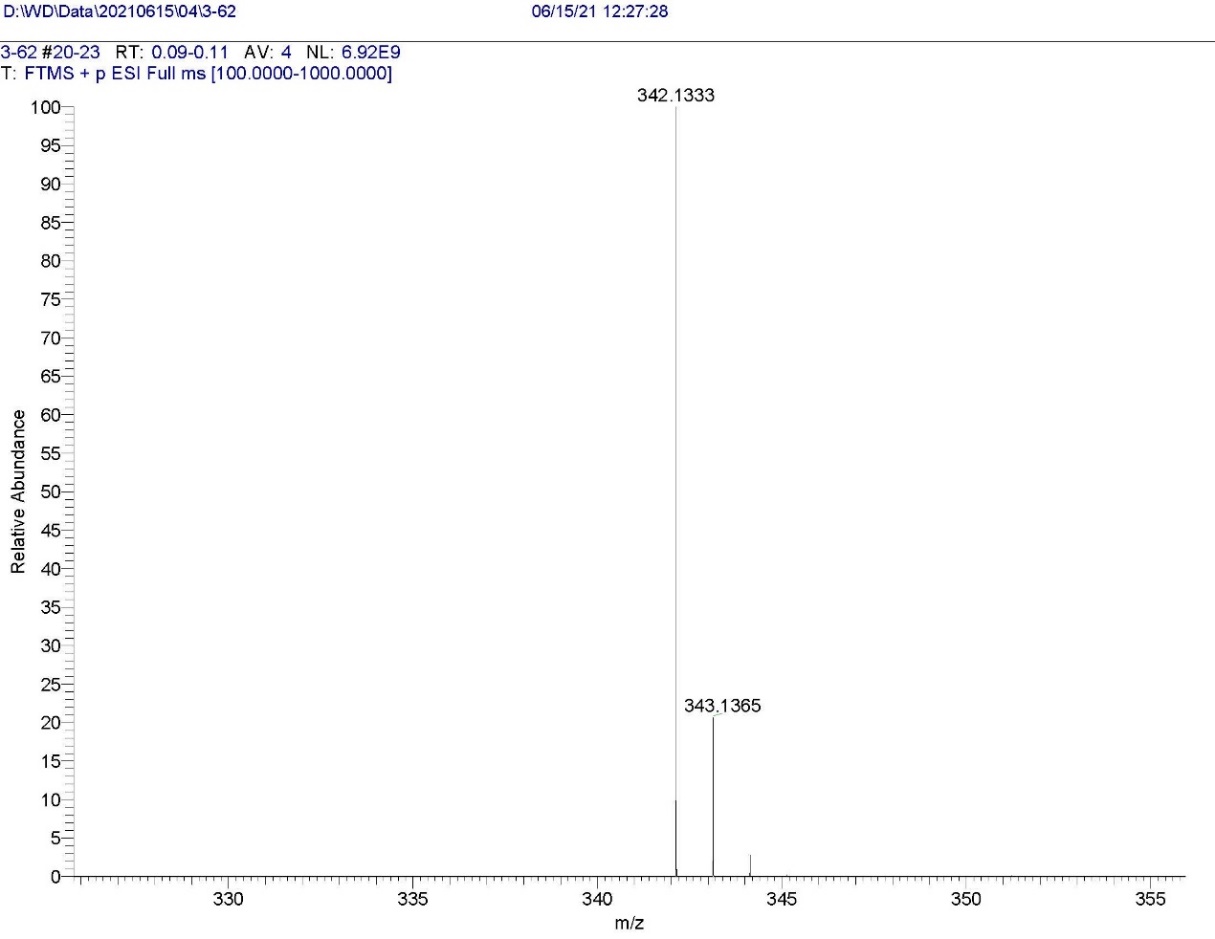


**S1-3** HRMS of the compound **I-1**

(*E*)-2,6-dimethoxy-4-(3-oxo-3-((2-(trifluoromethyl)phenyl)amino)prop-1-en-1-yl)phenyl acetate (**I-2**)


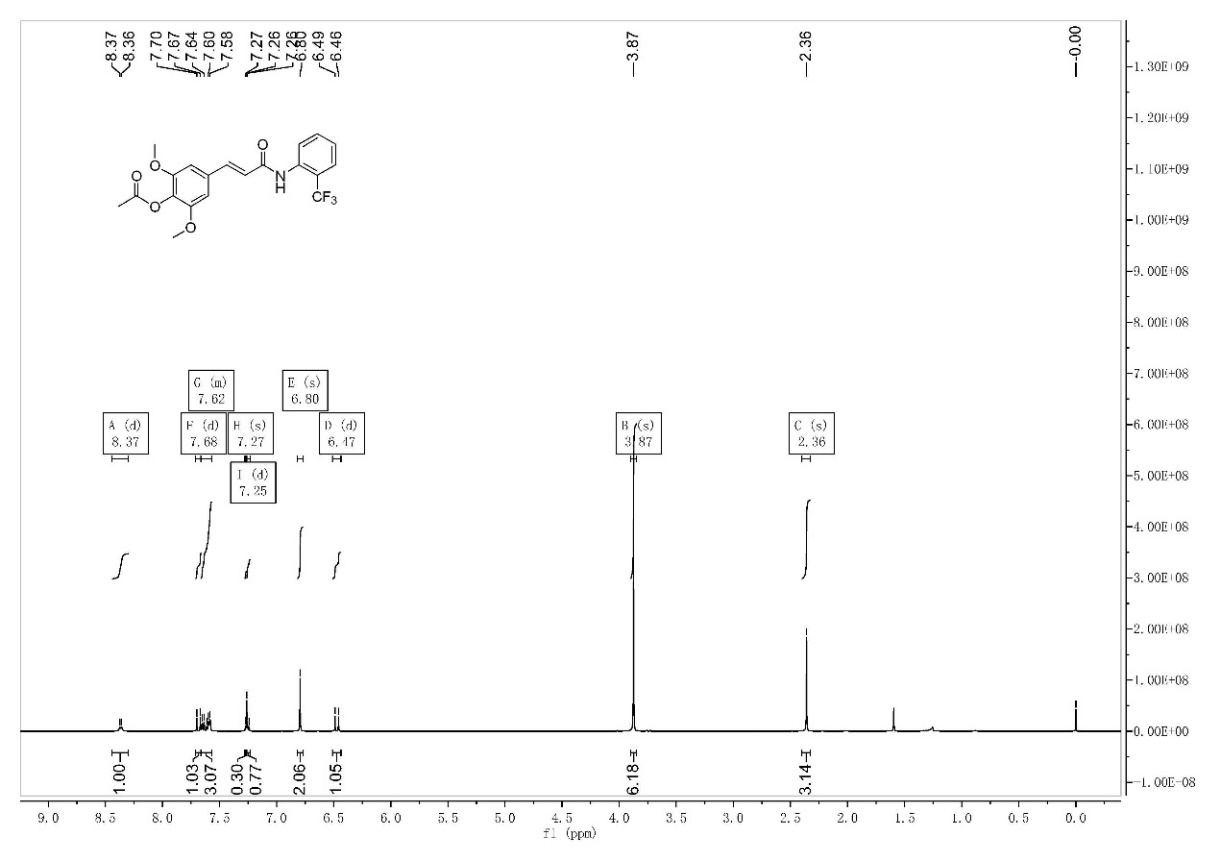


**S2-1** 1H-NMR of the compound **I-2**


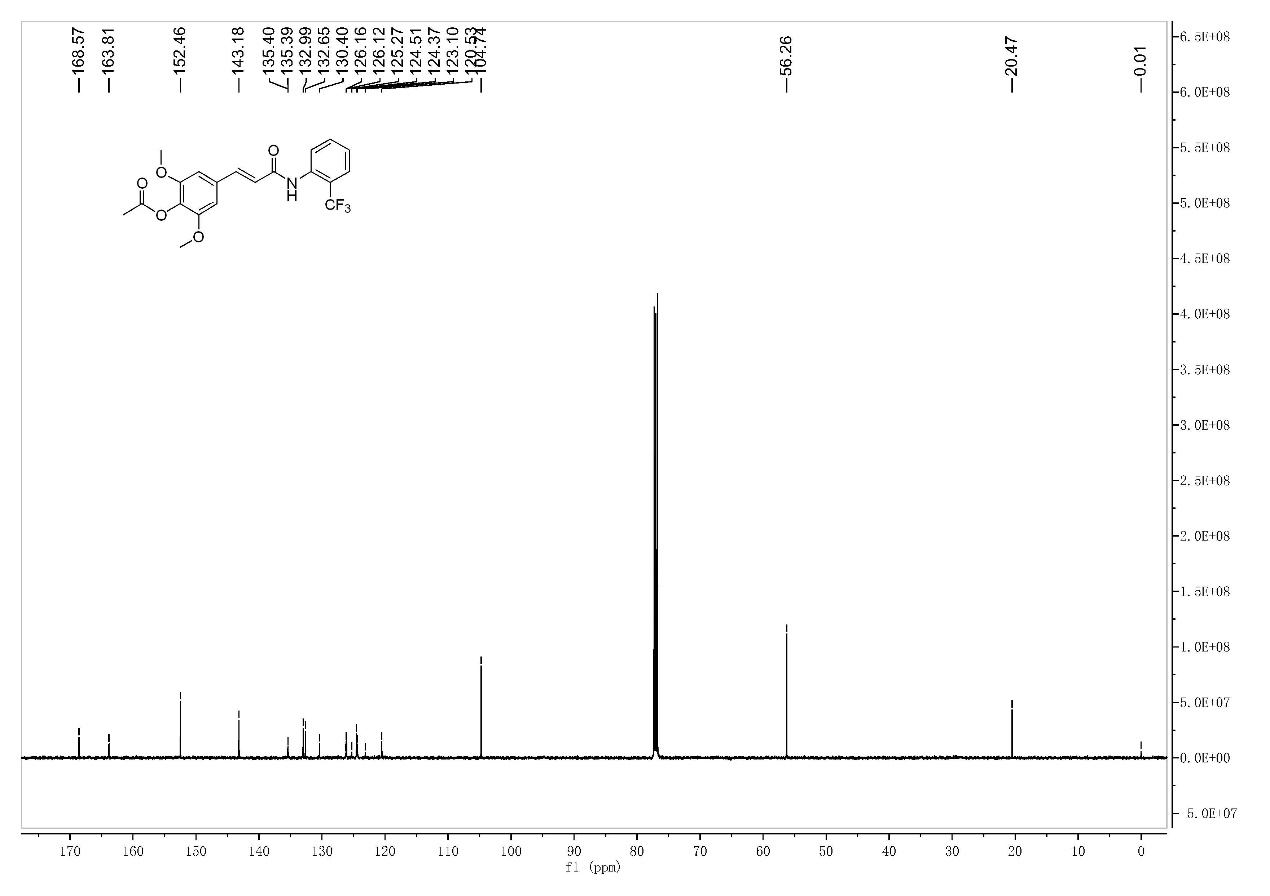


**S2-2** 13C-NMR of the compound **I-2**


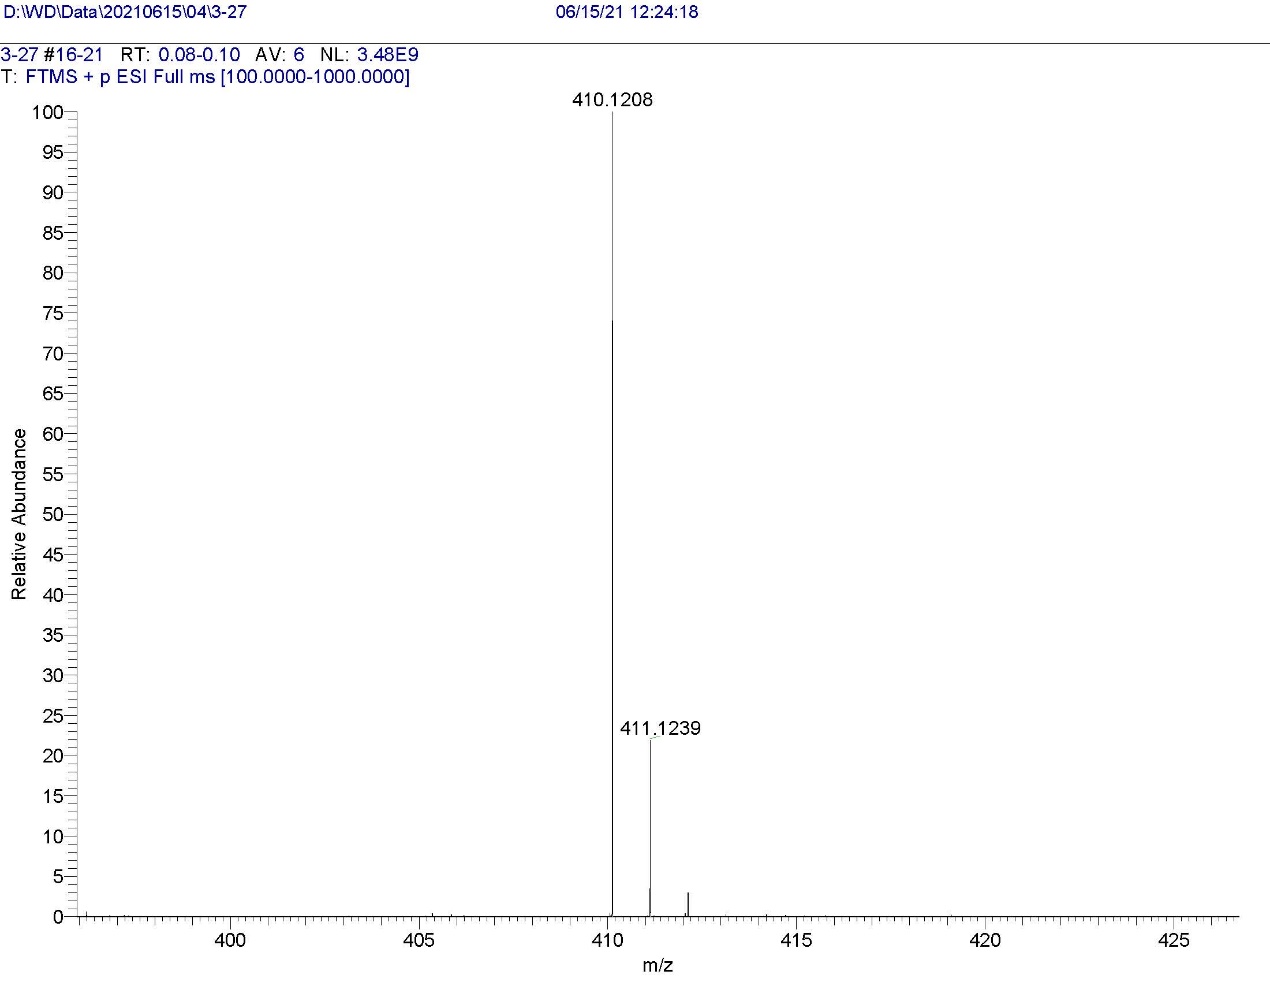


**S2-3** HRMS of the compound **I-2**

(*E*)-4-(3-((2,3-dichlorophenyl)amino)-3-oxoprop-1-en-1-yl)-2,6-dimethoxyphenyl acetate (**I-3**)


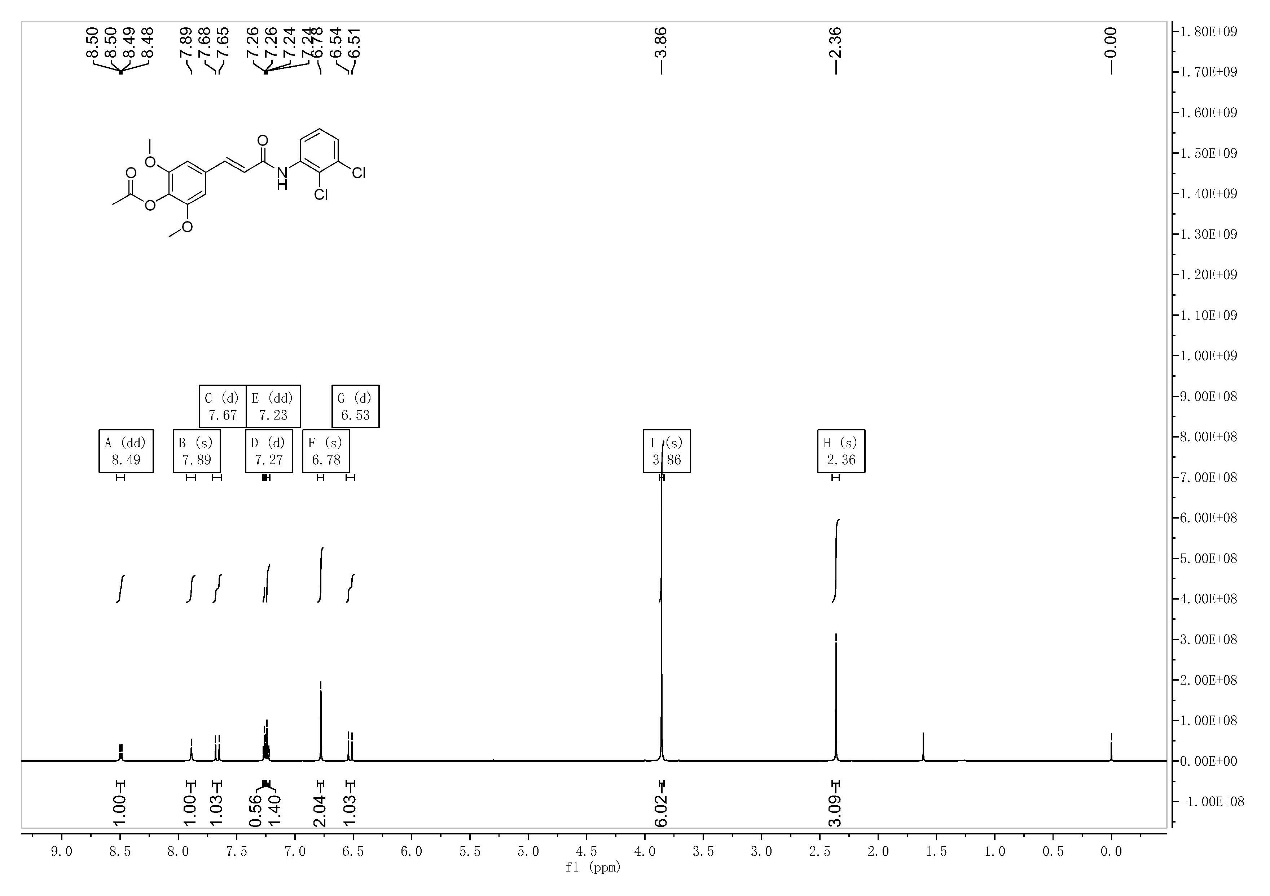


**S3-1** 1H-NMR of the compound **I-3**


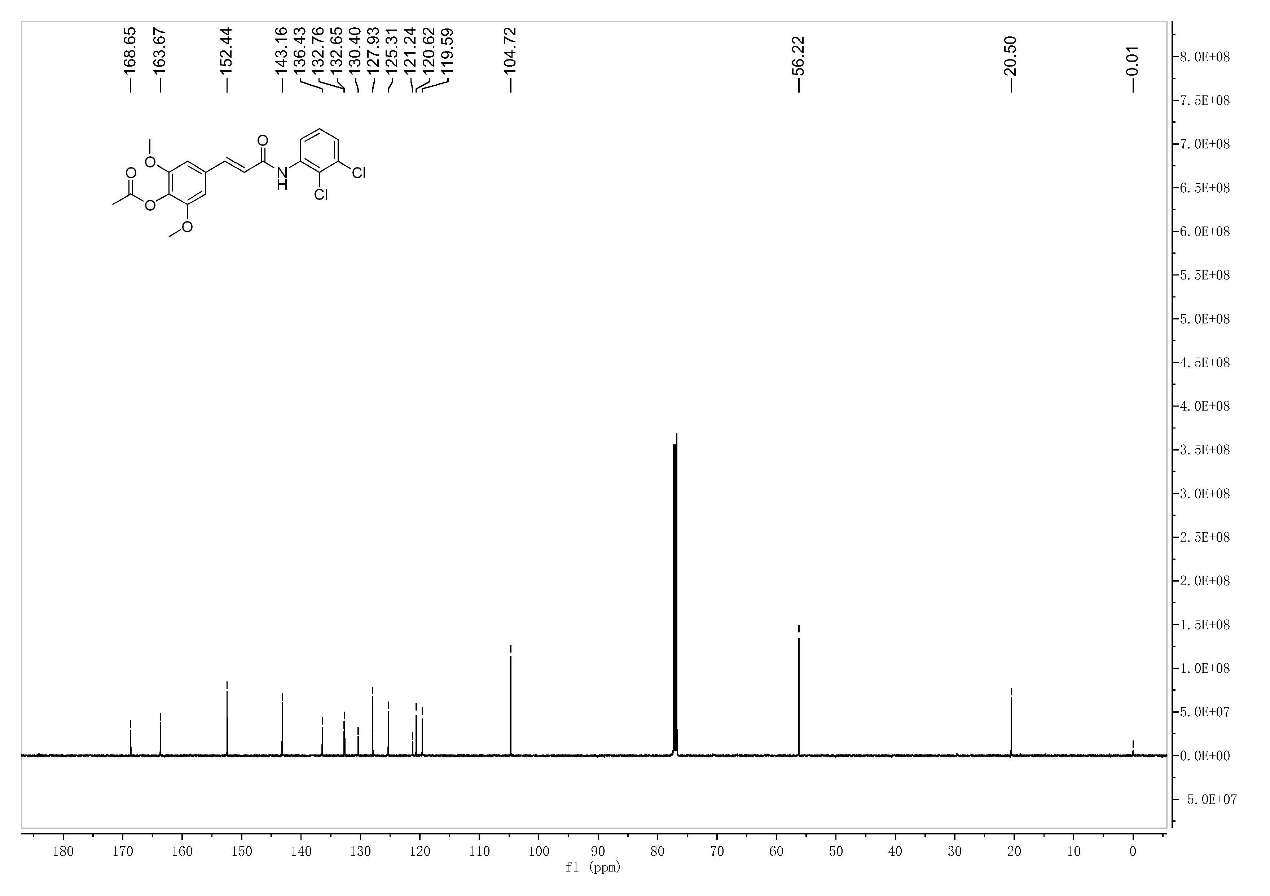


**S3-2** 13C-NMR of the compound **I-3**


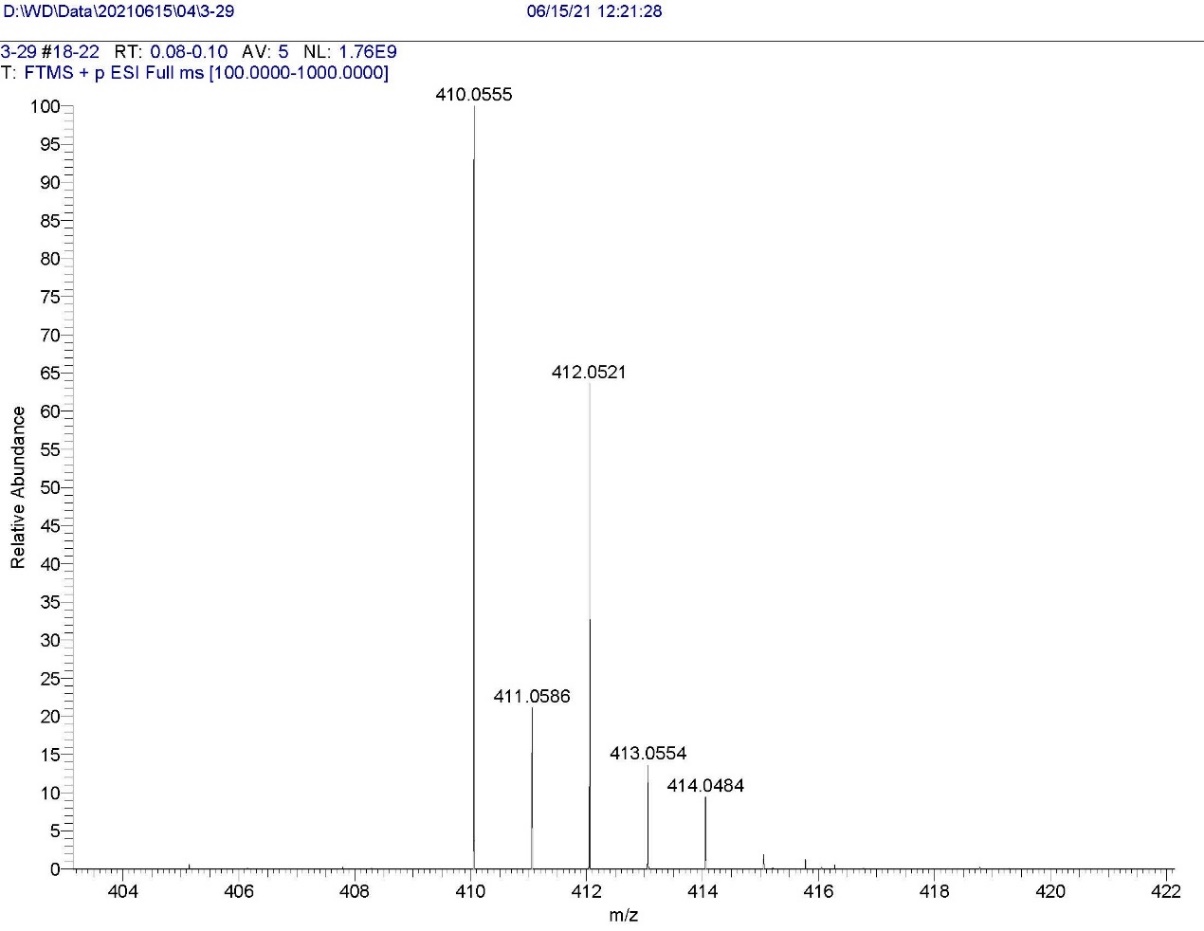


**S3-3** HRMS of the compound **I-3**

(*E*)-2,6-dimethoxy-4-(3-((2-methoxy-5-methylphenyl)amino)-3-oxoprop-1-en-1-yl)phenyl acetate (**I-4**)


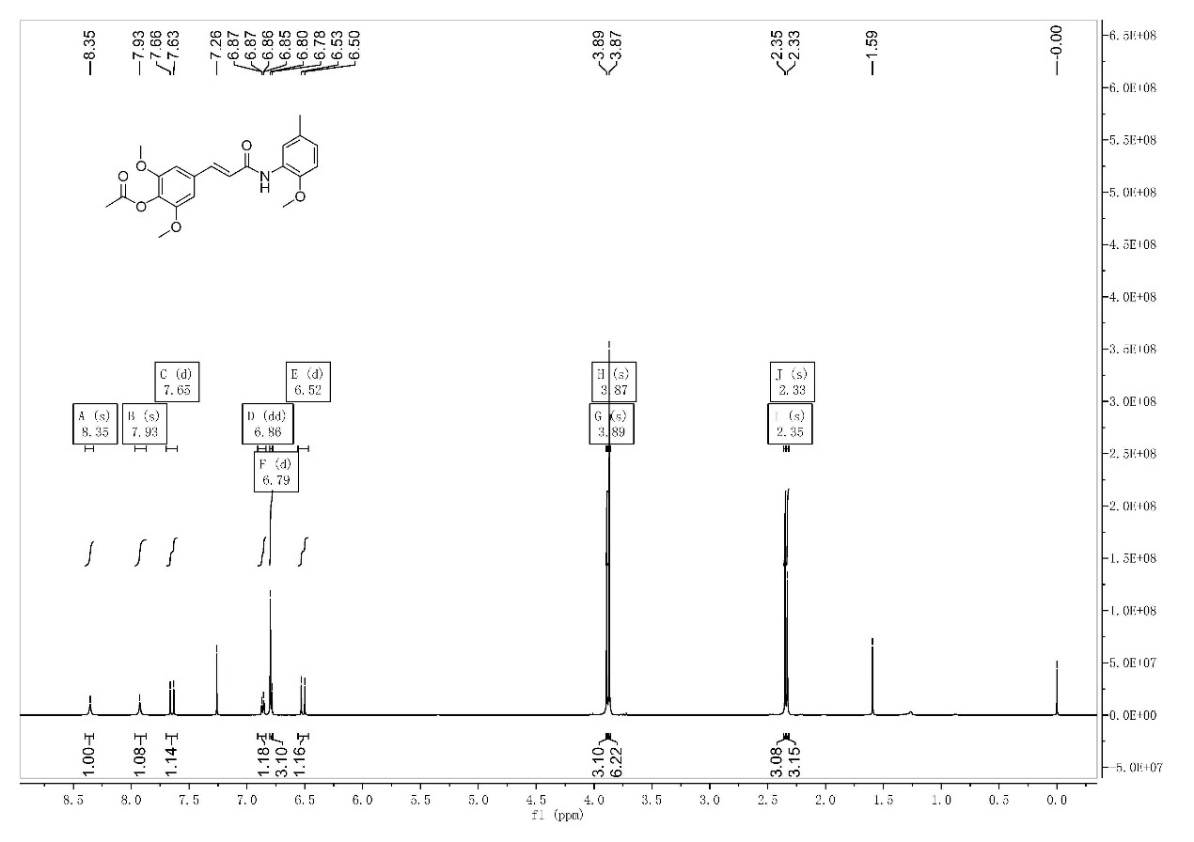


**S4-1** 1H-NMR of the compound **I-4**


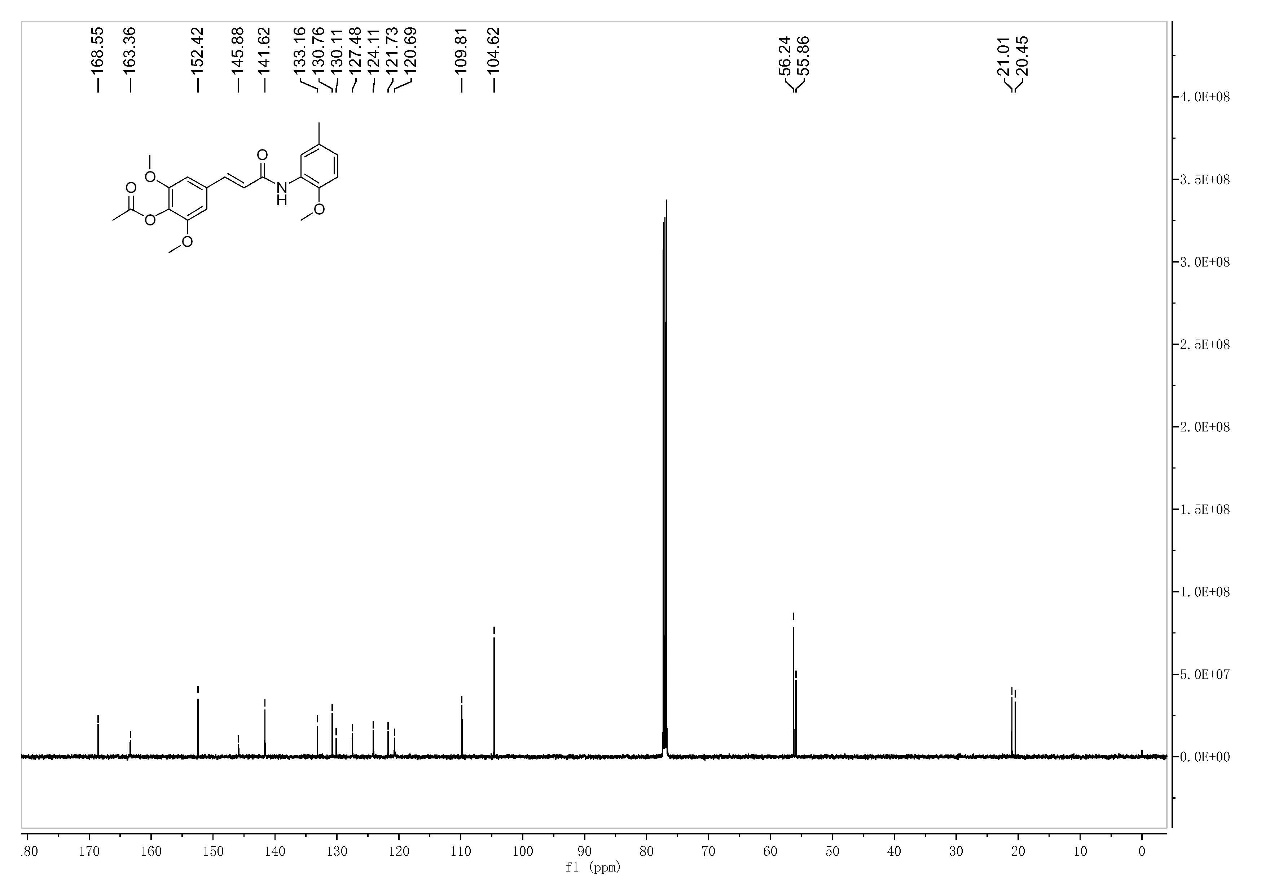


**S4-2** 13C-NMR of the compound **I-4**


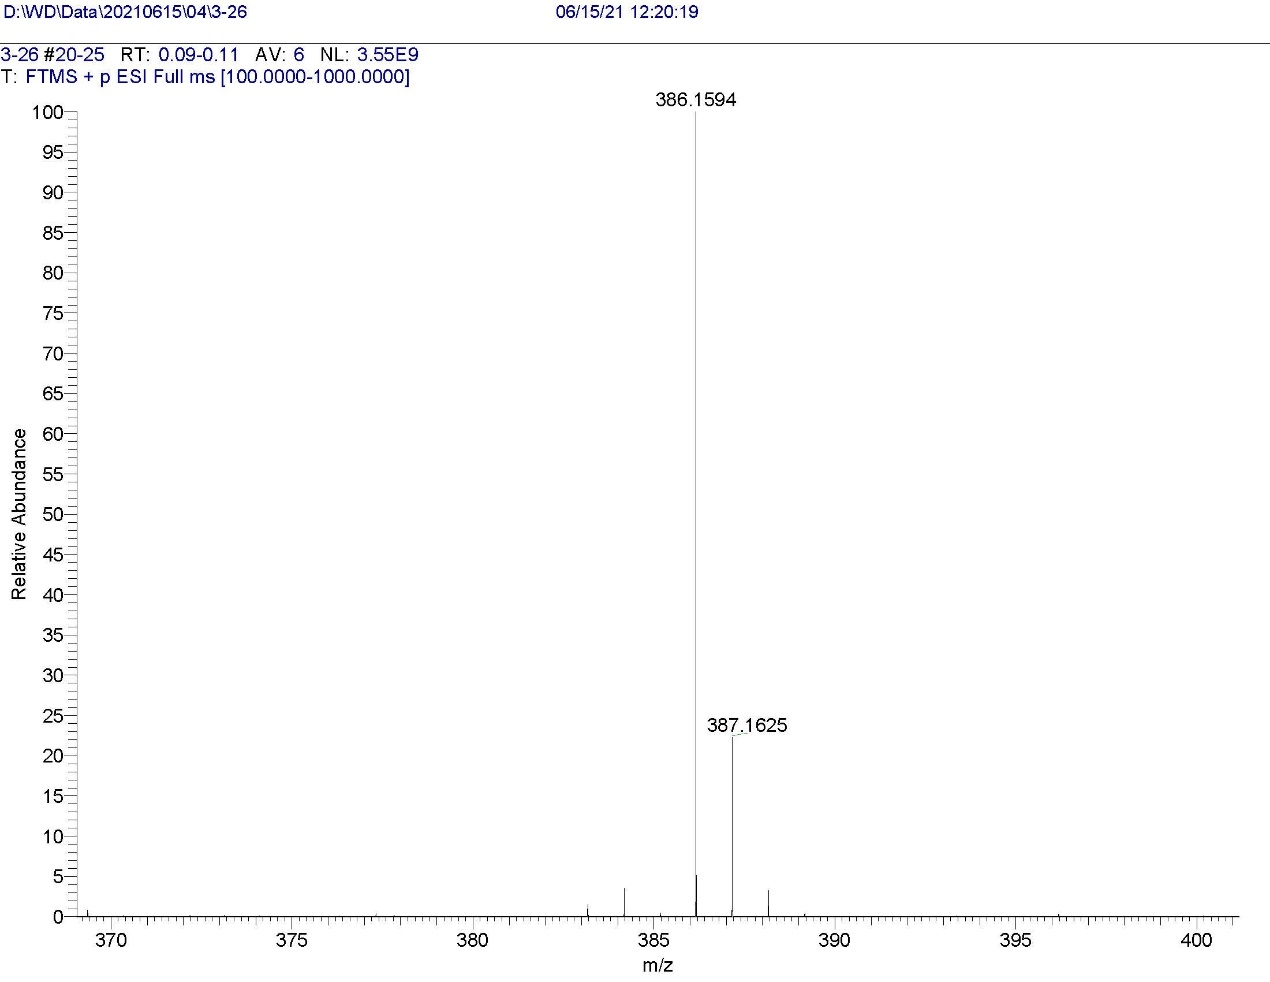


**S4-3** HRMS of the compound **I-4**

(*E*)-4-(3-((3-isopropoxyphenyl)amino)-3-oxoprop-1-en-1-yl)-2,6-dimethoxyphenyl acetate (**I-5**)


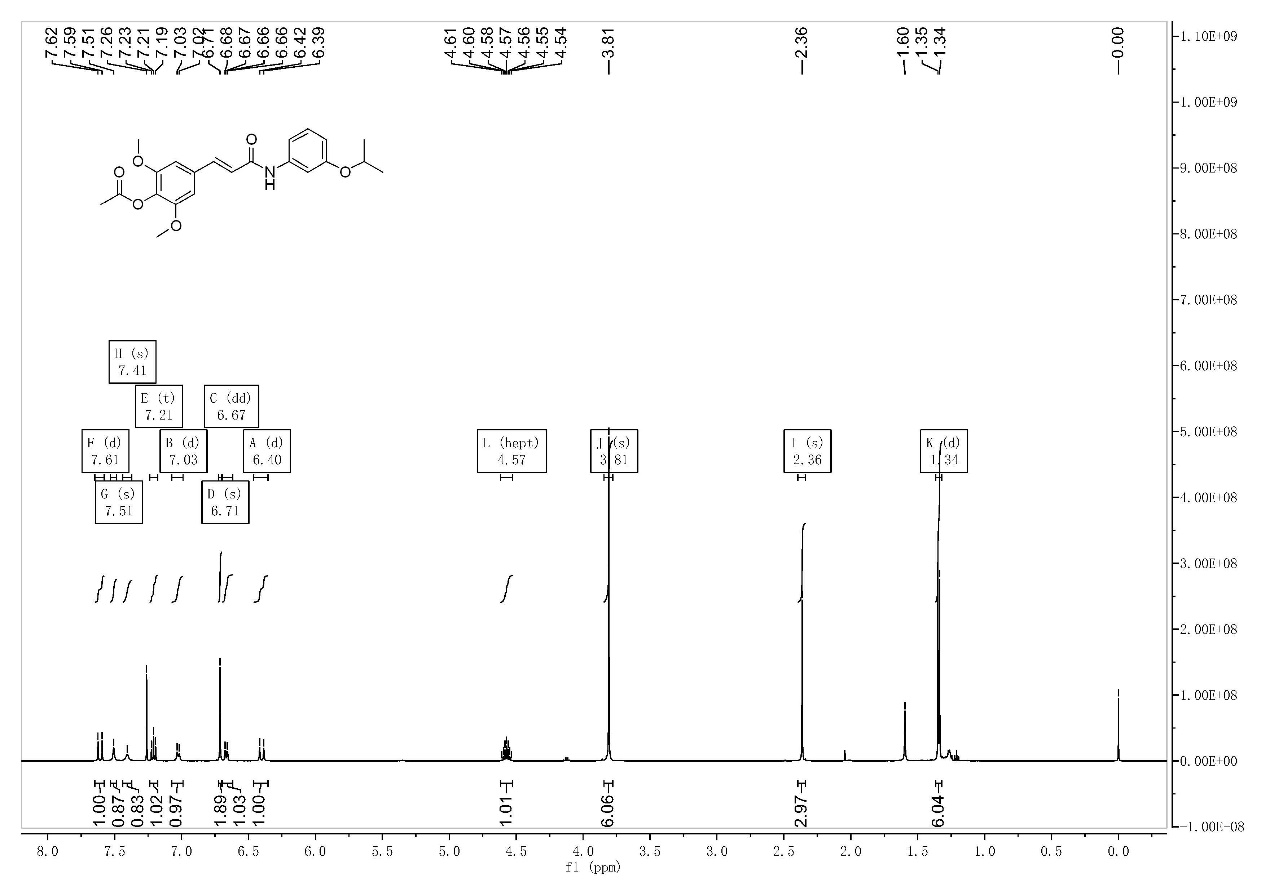


**S5-1** 1H-NMR of the compound **I-5**


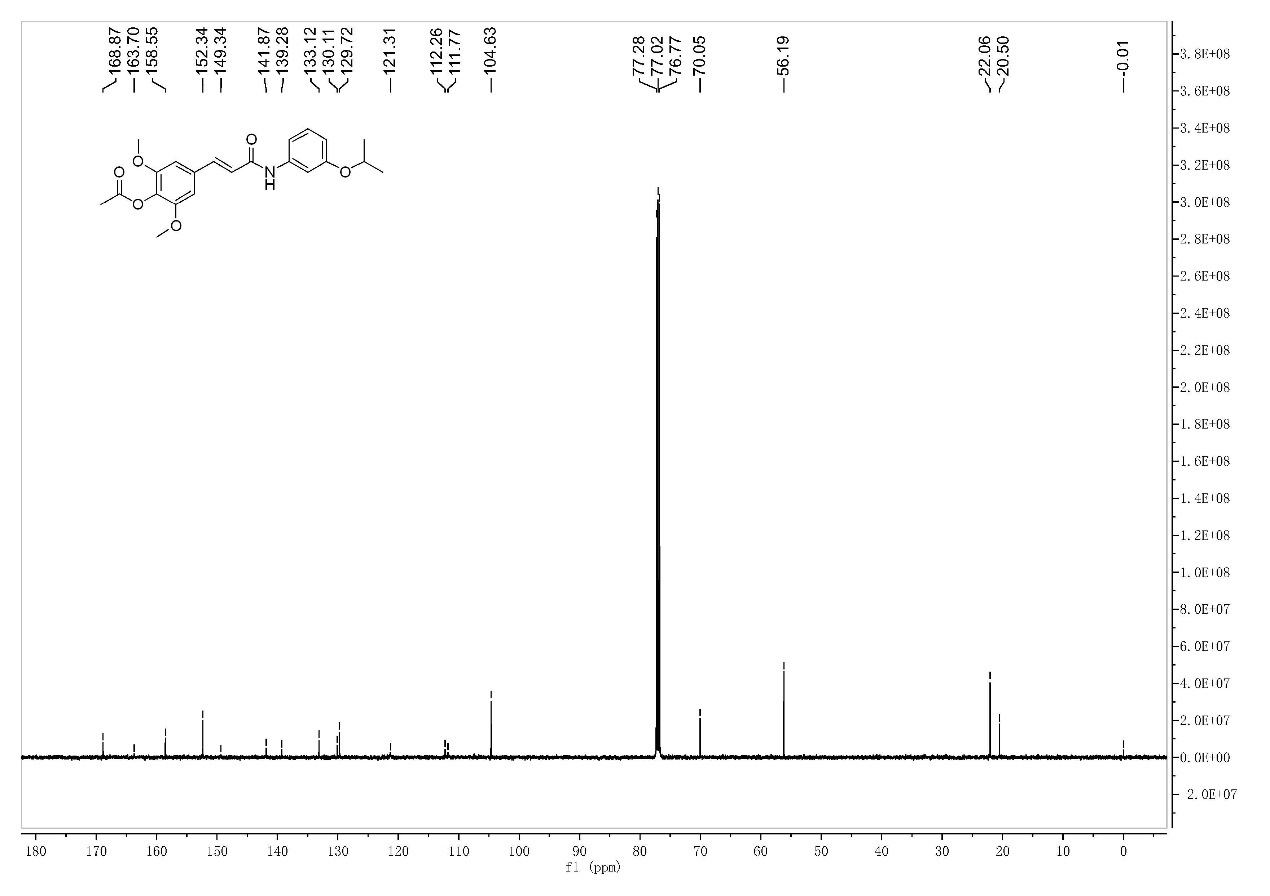


**S5-2** 13C-NMR of the compound **I-5**


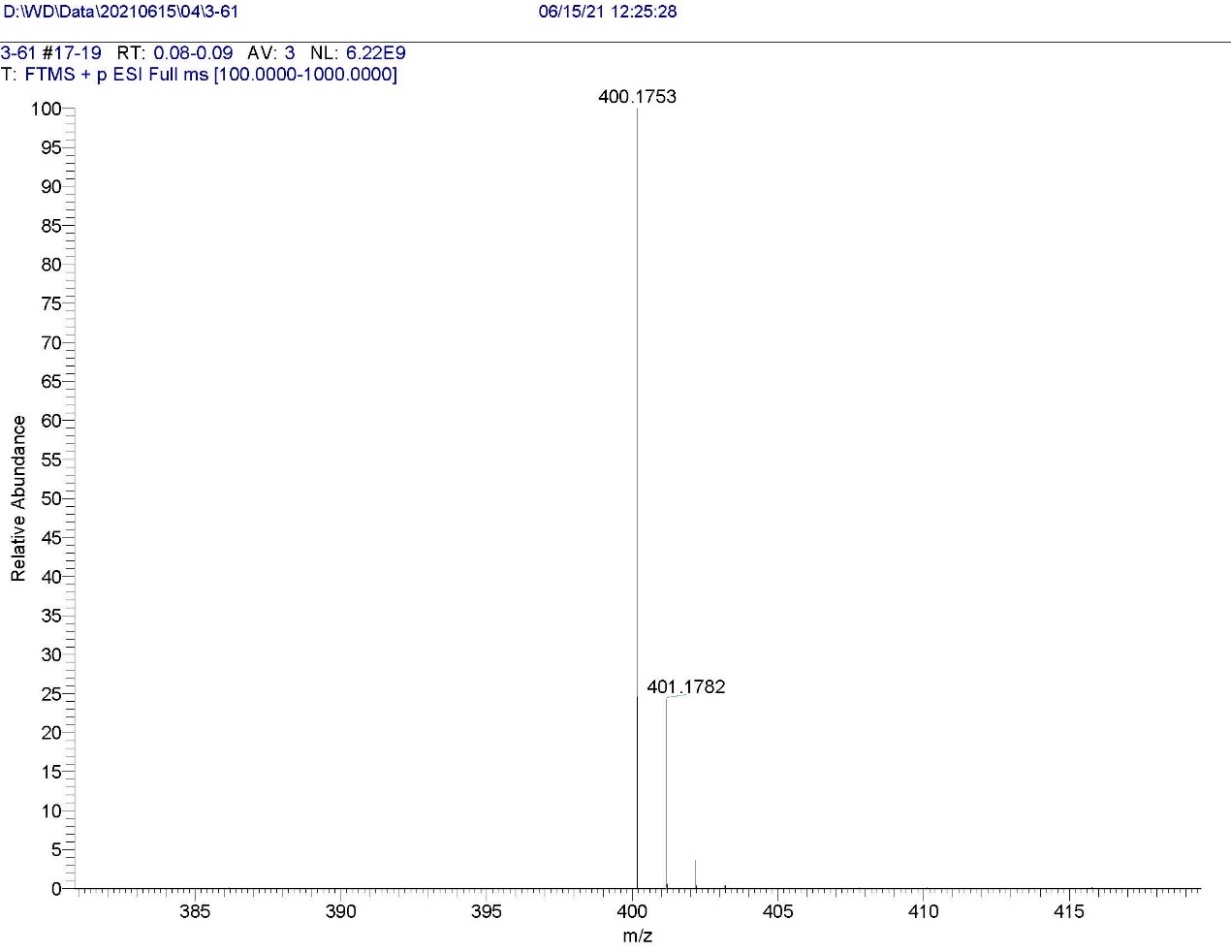


**S5-3** HRMS of the compound **I-5**

(*E*)-6-methoxy-7-methyl-5-(3-methyl-6-oxo-6-(phenylamino)hex-2-en-1-yl)-3-oxo-1,3-dihydroisobenzofuran-4-yl acetate (**II-1**)


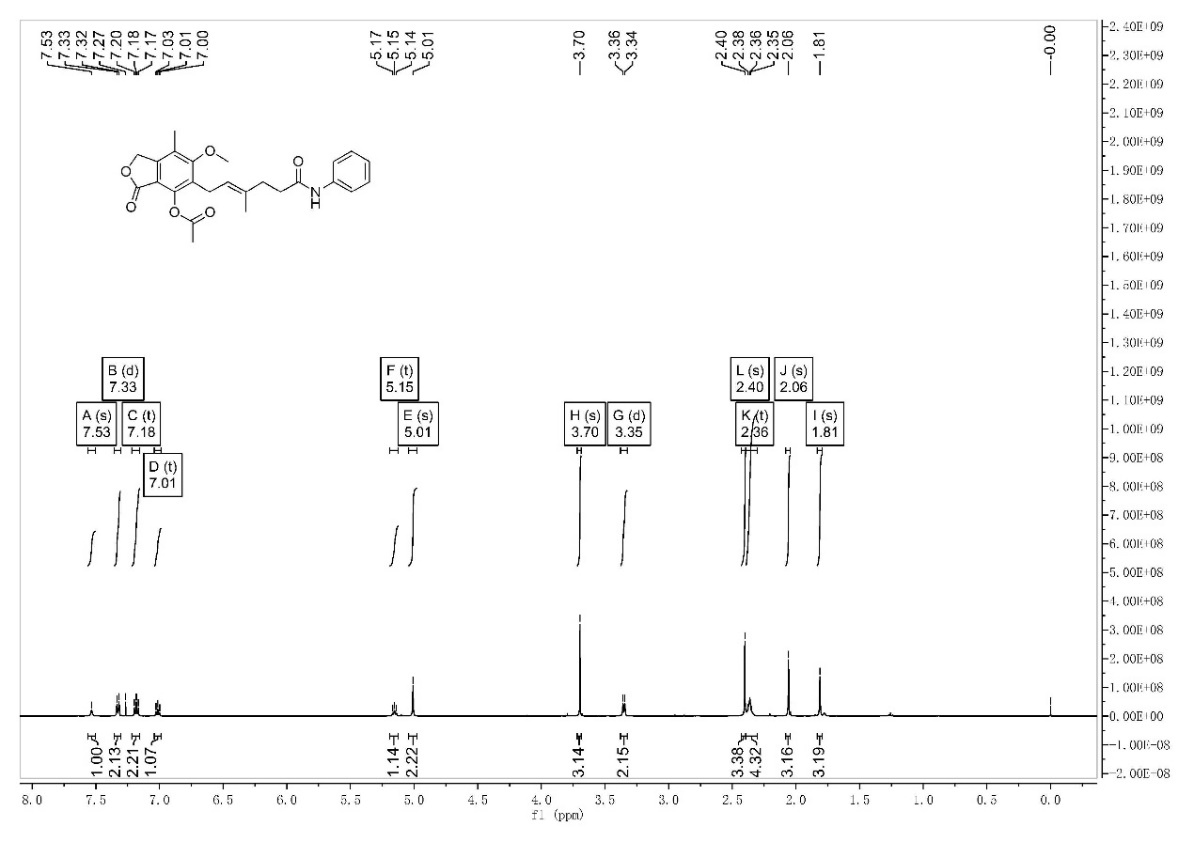


**S6-1** 1H-NMR of the compound **II-1**


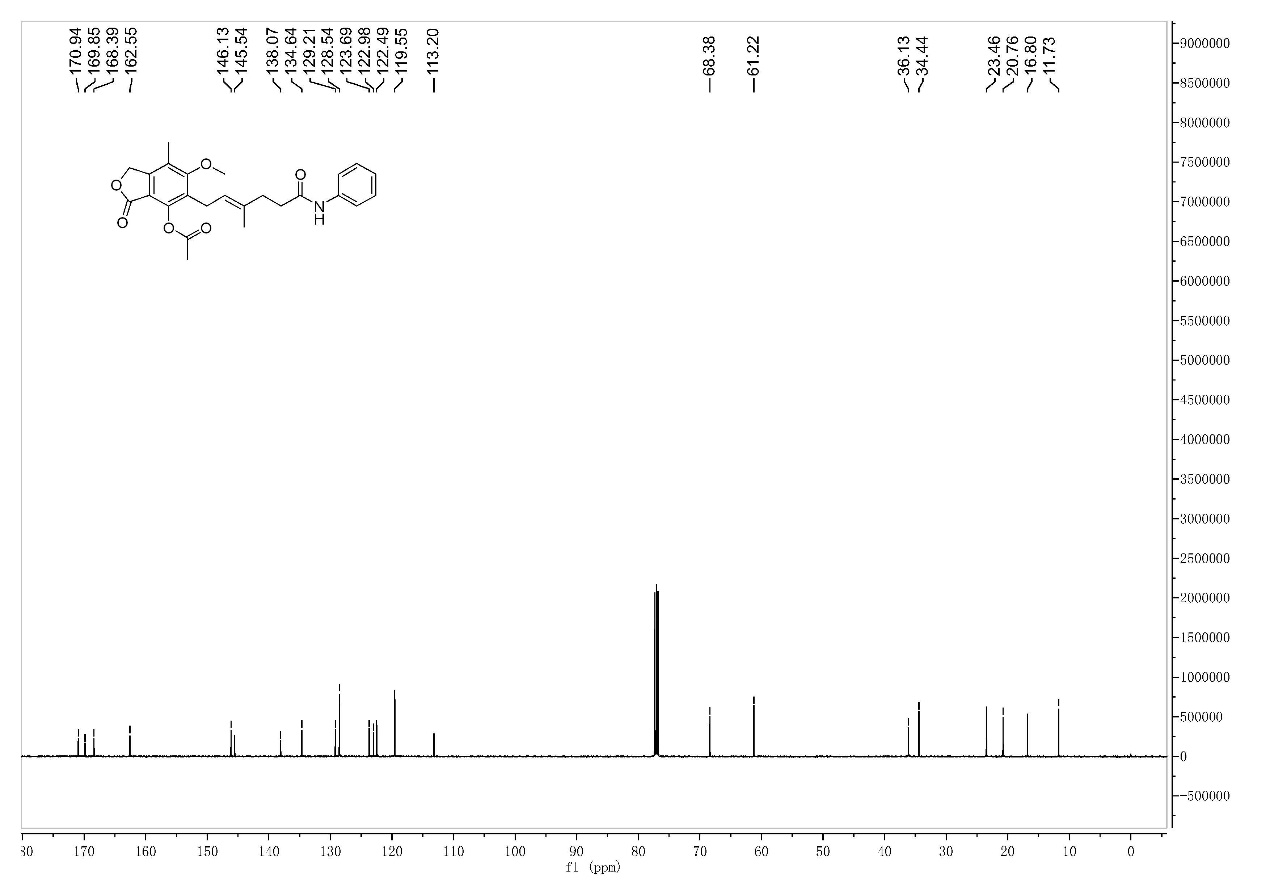


**S6-2** 13C-NMR of the compound **II-1**


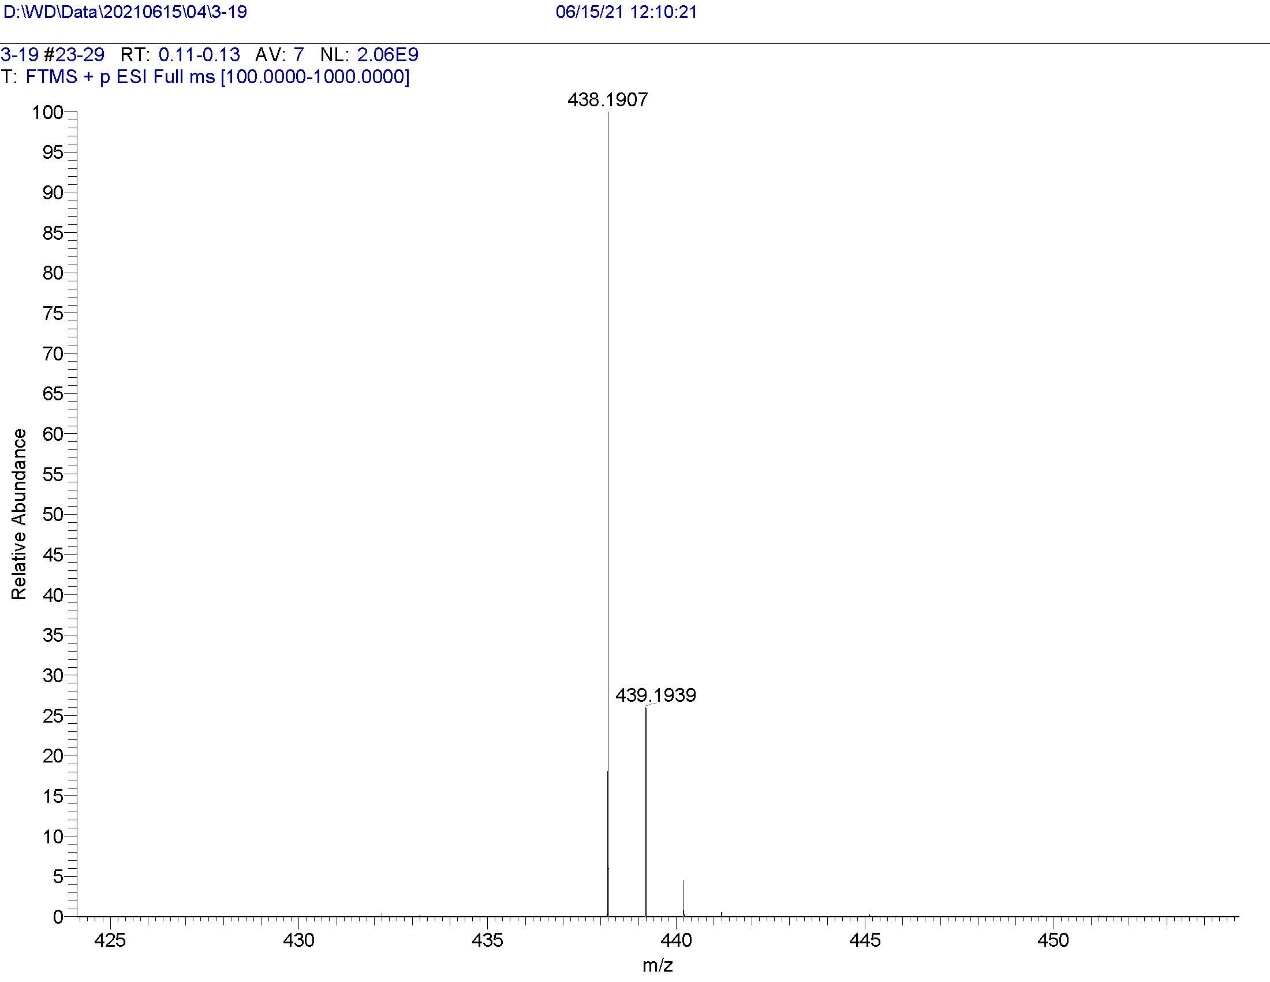


**S6-3** HRMS of the compound **II-1**

(*E*)-6-methoxy-7-methyl-5-(3-methyl-6-oxo-6-((2-(trifluoromethyl)phenyl) amino)hex-2-en-1-yl)-3-oxo-1,3-dihydroisobenzofuran-4-yl acetate (**II-2**)


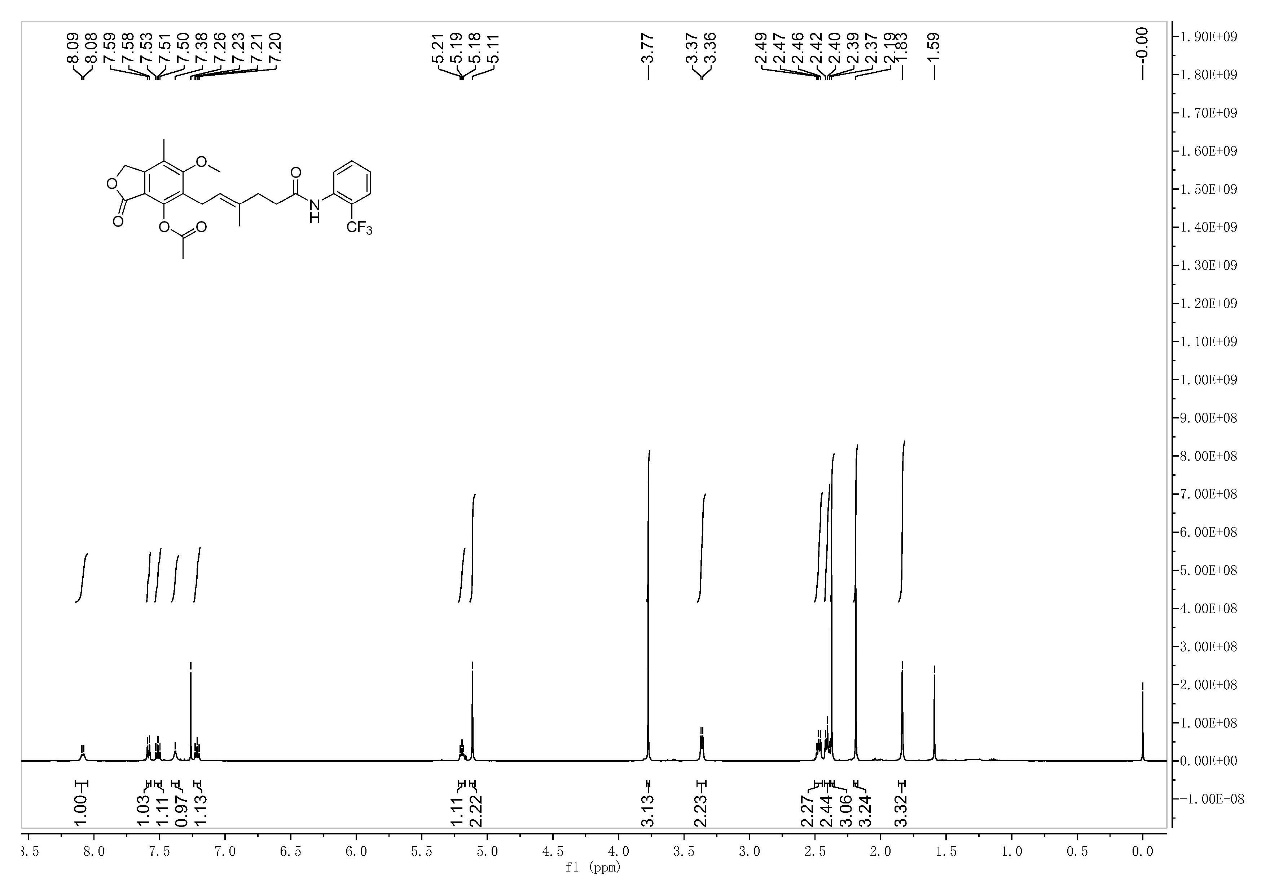


**S7-1** 1H-NMR of the compound **II-2**


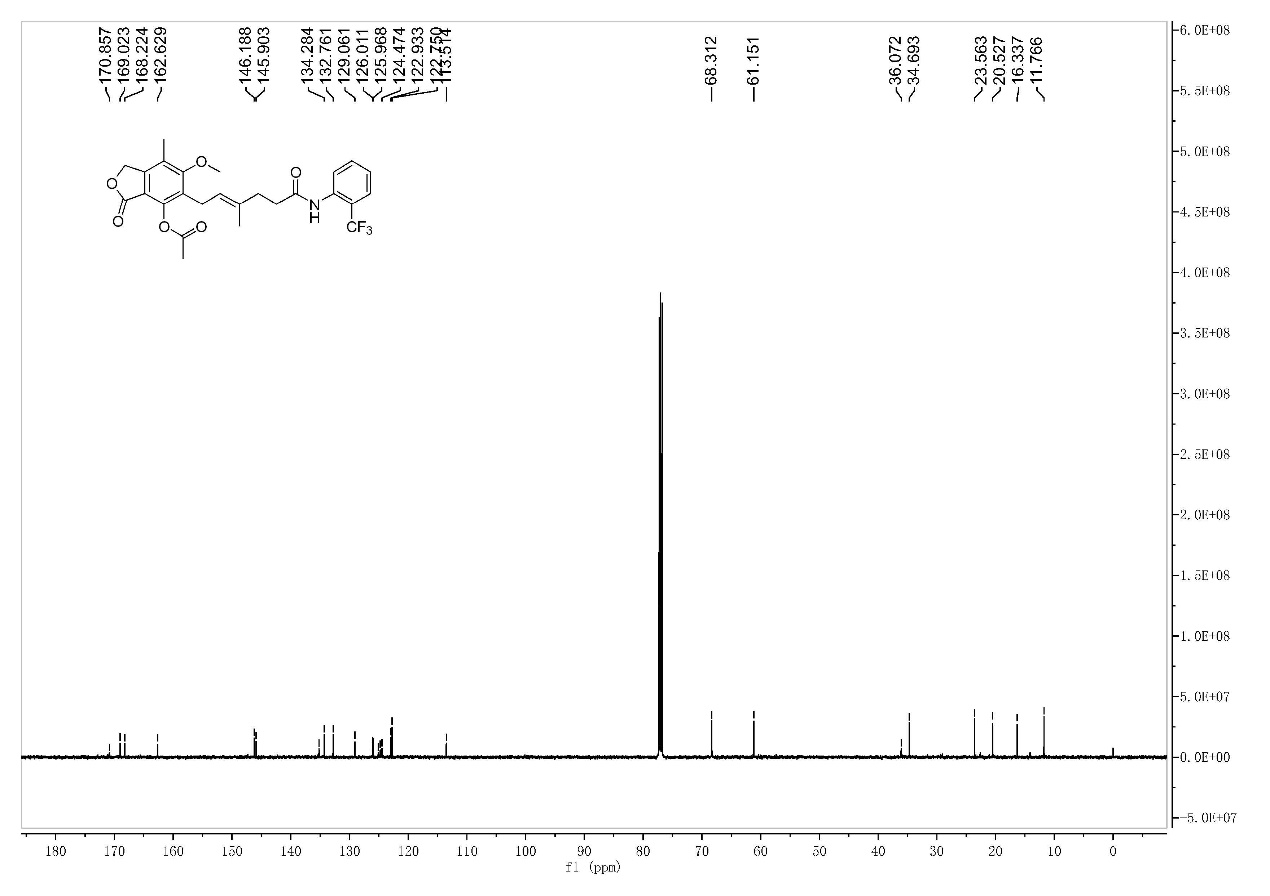


**S7-2** 13C-NMR of the compound **II-2**


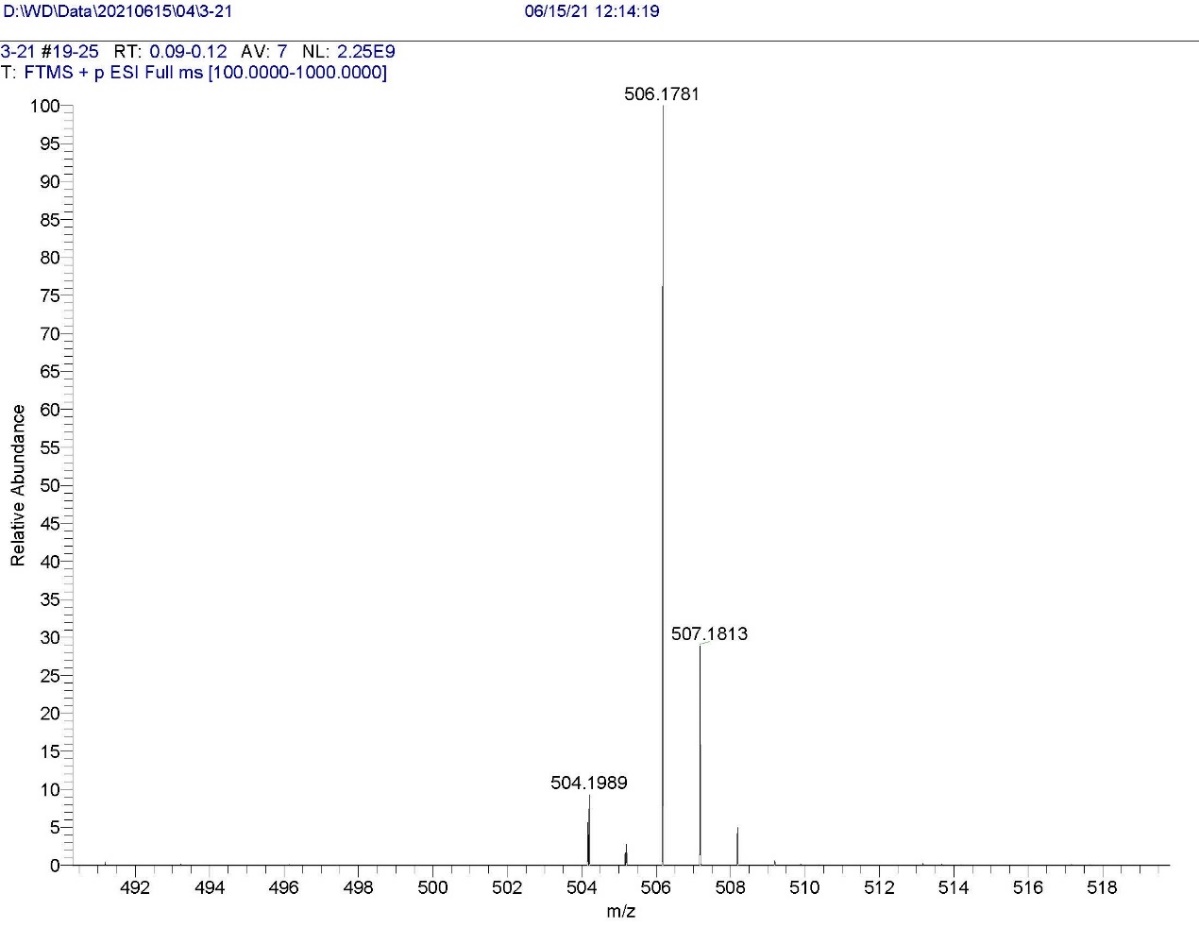


**S7-3** HRMS of the compound **II-2**

(*E*)-5-(6-((2,3-dichlorophenyl)amino)-3-methyl-6-oxohex-2-en-1-yl)-6-methoxy-7-methyl-3-oxo-1,3-dihydroisobenzofuran-4-yl acetate (**II-3**)


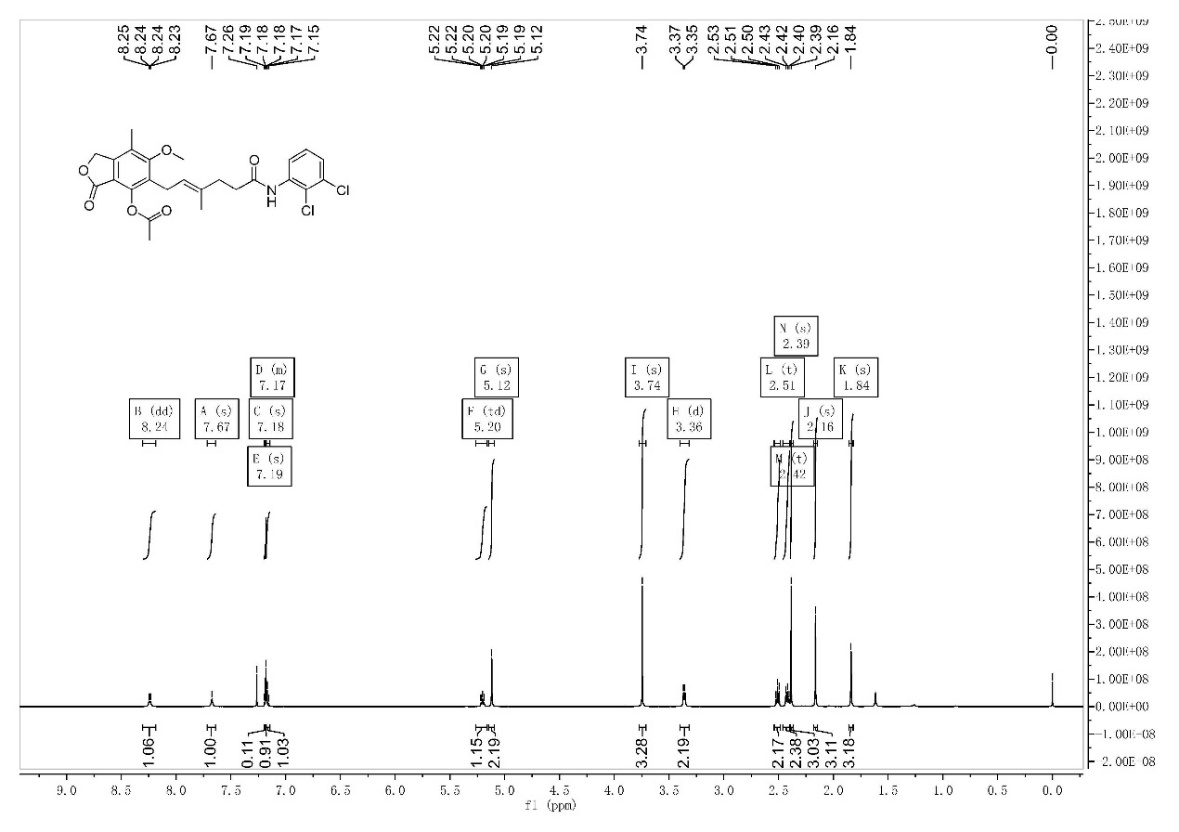


**S8-1** 1H-NMR of the compound **II-3**


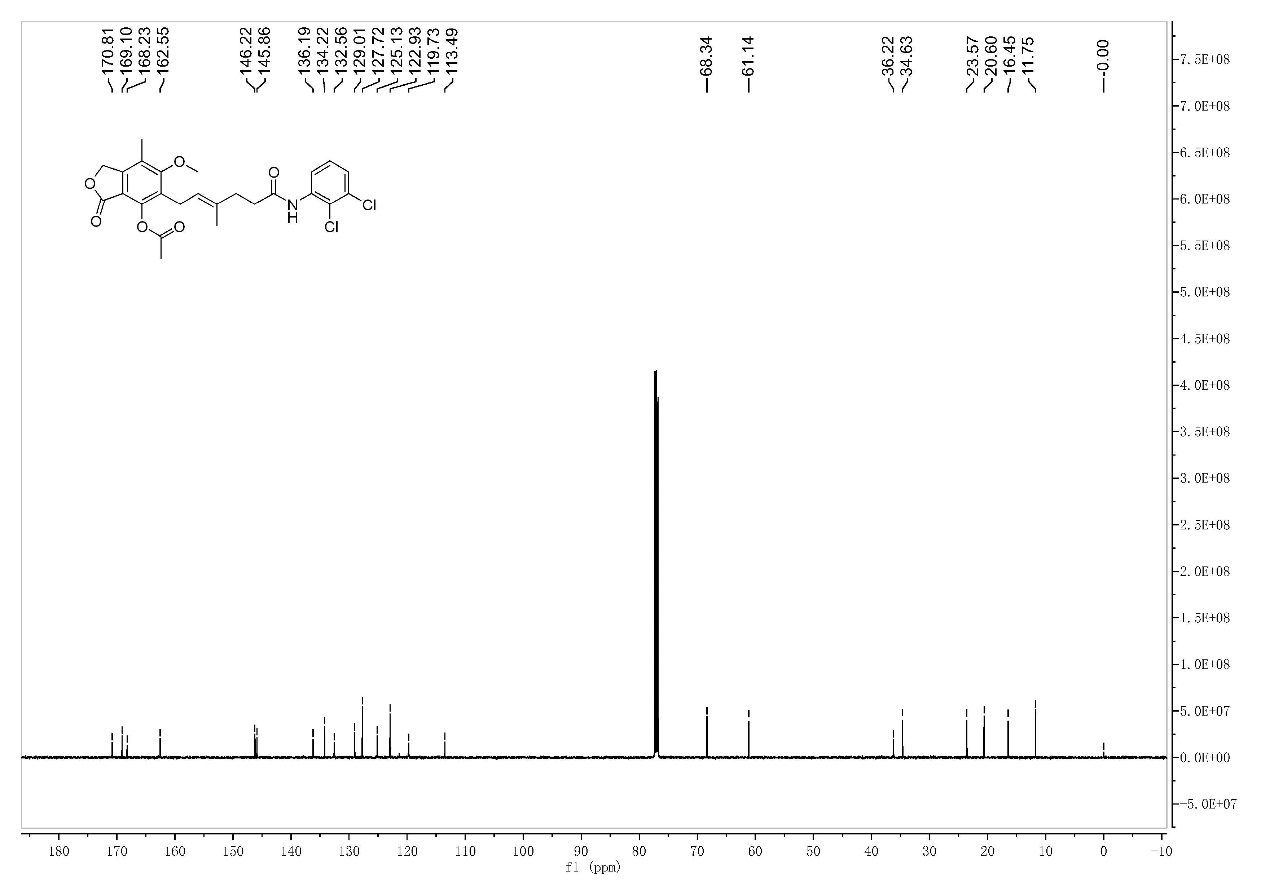


**S8-2** 13C-NMR of the compound **II-3**


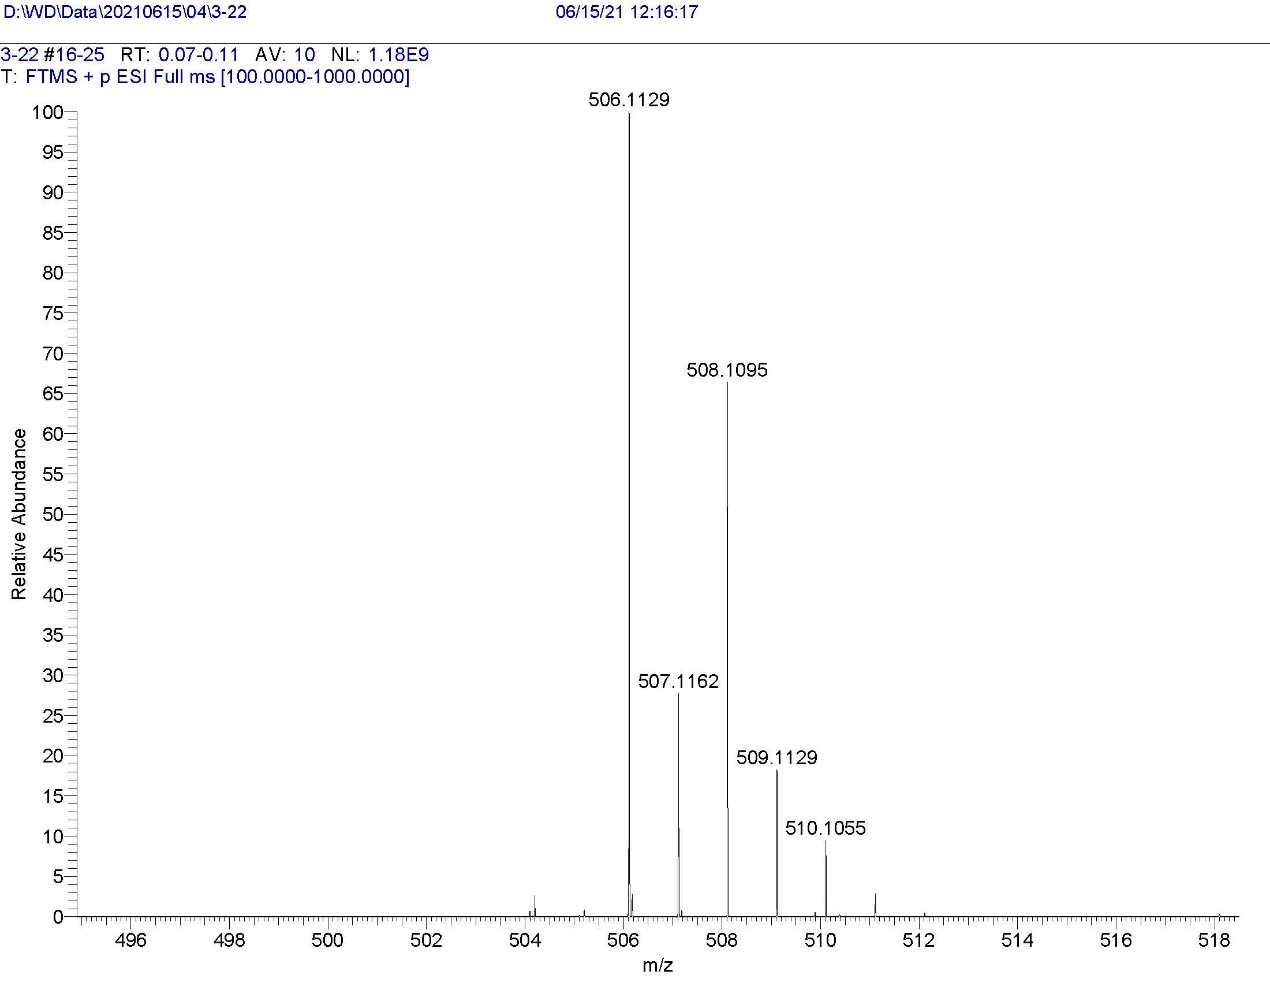


**S8-3** HRMS of the compound **II-3**

(*E*)-6-methoxy-5-(6-((2-methoxy-5-methylphenyl)amino)-3-methyl-6-oxohex-2-en-1-yl)-7-methyl-3-oxo-1,3-dihydroisobenzofuran-4-yl acetate (**II-4**)


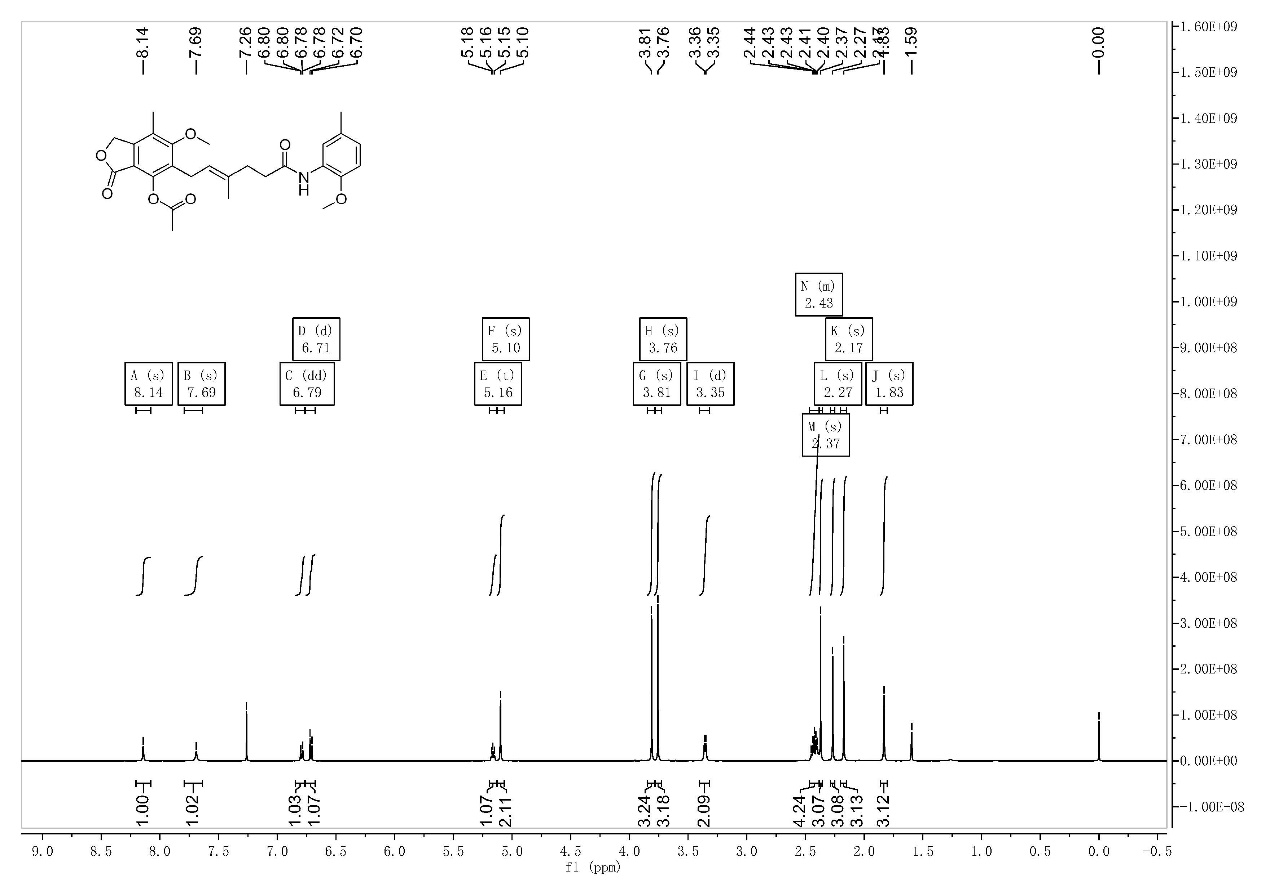


**S9-1** 1H-NMR of the compound **II-4**


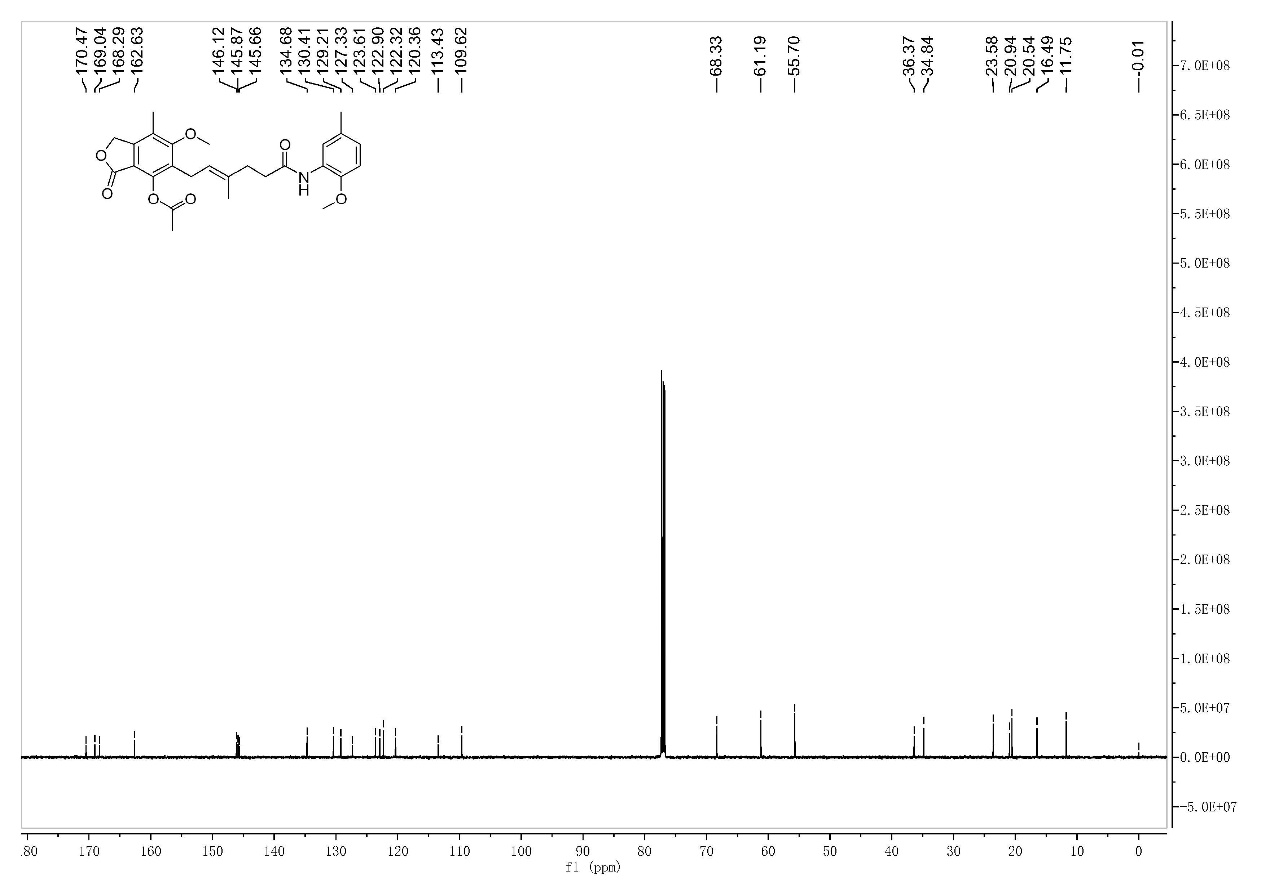


**S9-2** 13C-NMR of the compound **II-4**


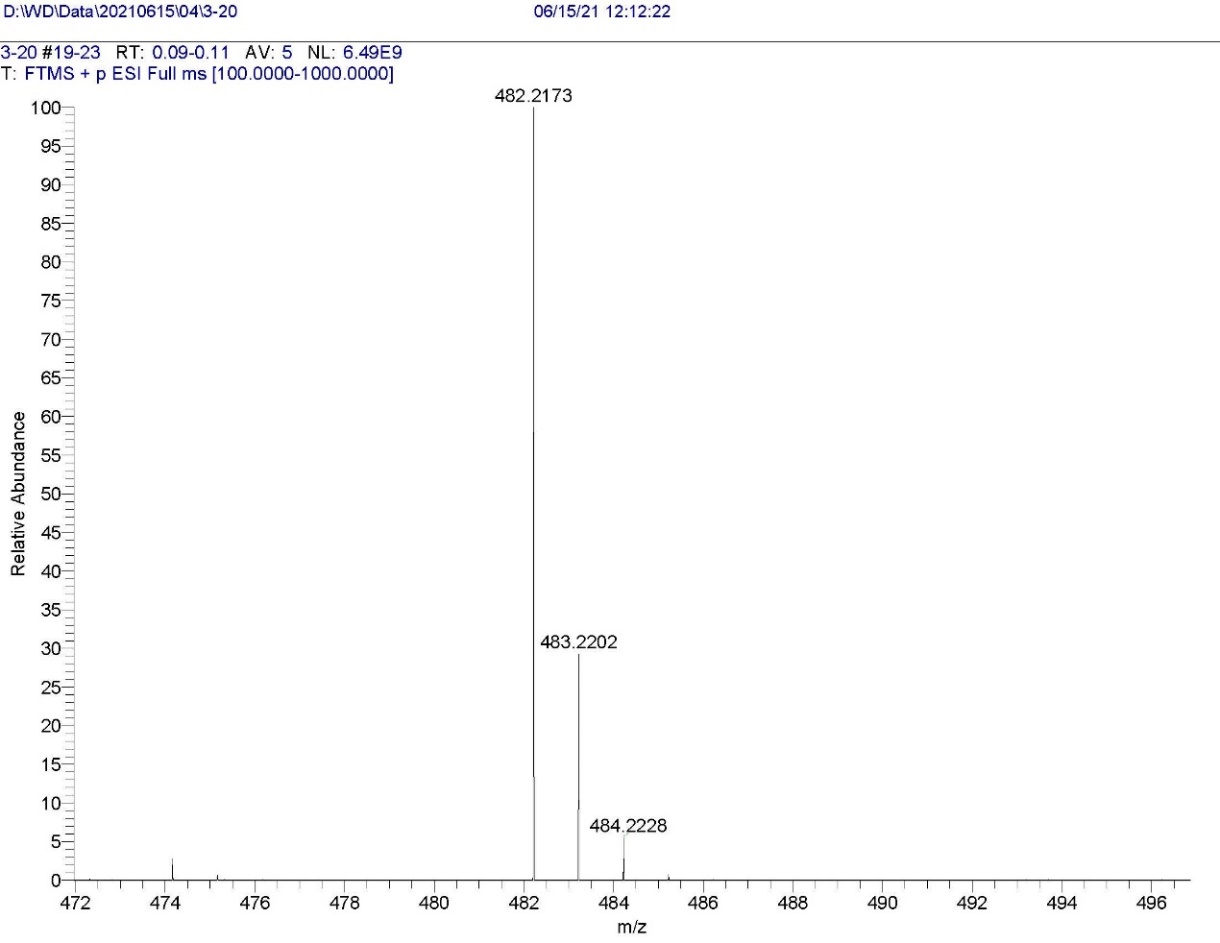


**S9-3** HRMS of the compound **II-4**

(*E*)-5-(6-((3-isopropoxyphenyl)amino)-3-methyl-6-oxohex-2-en-1-yl)-6-methoxy-7-methyl-3-oxo-1,3-dihydroisobenzofuran-4-yl acetate (**II-5**)


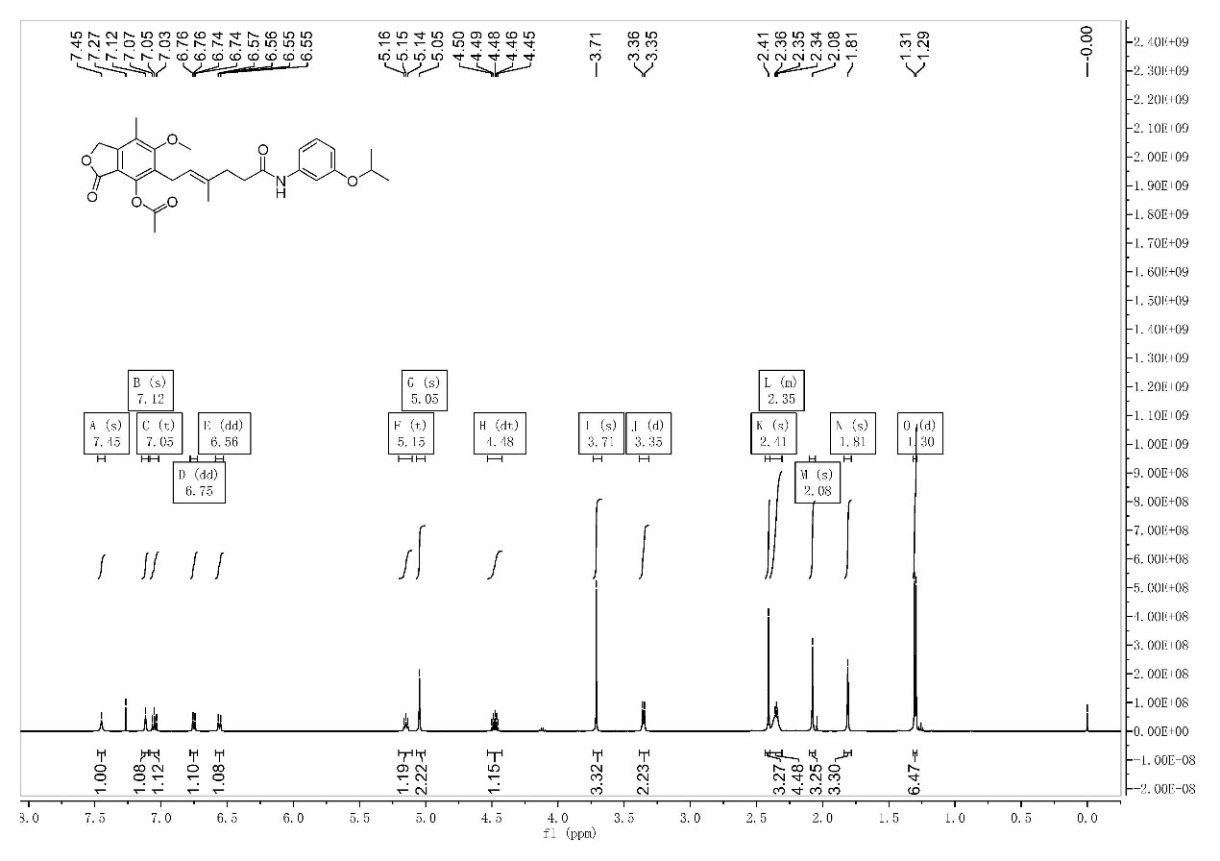


**S10-1** 1H-NMR of the compound **II-5**


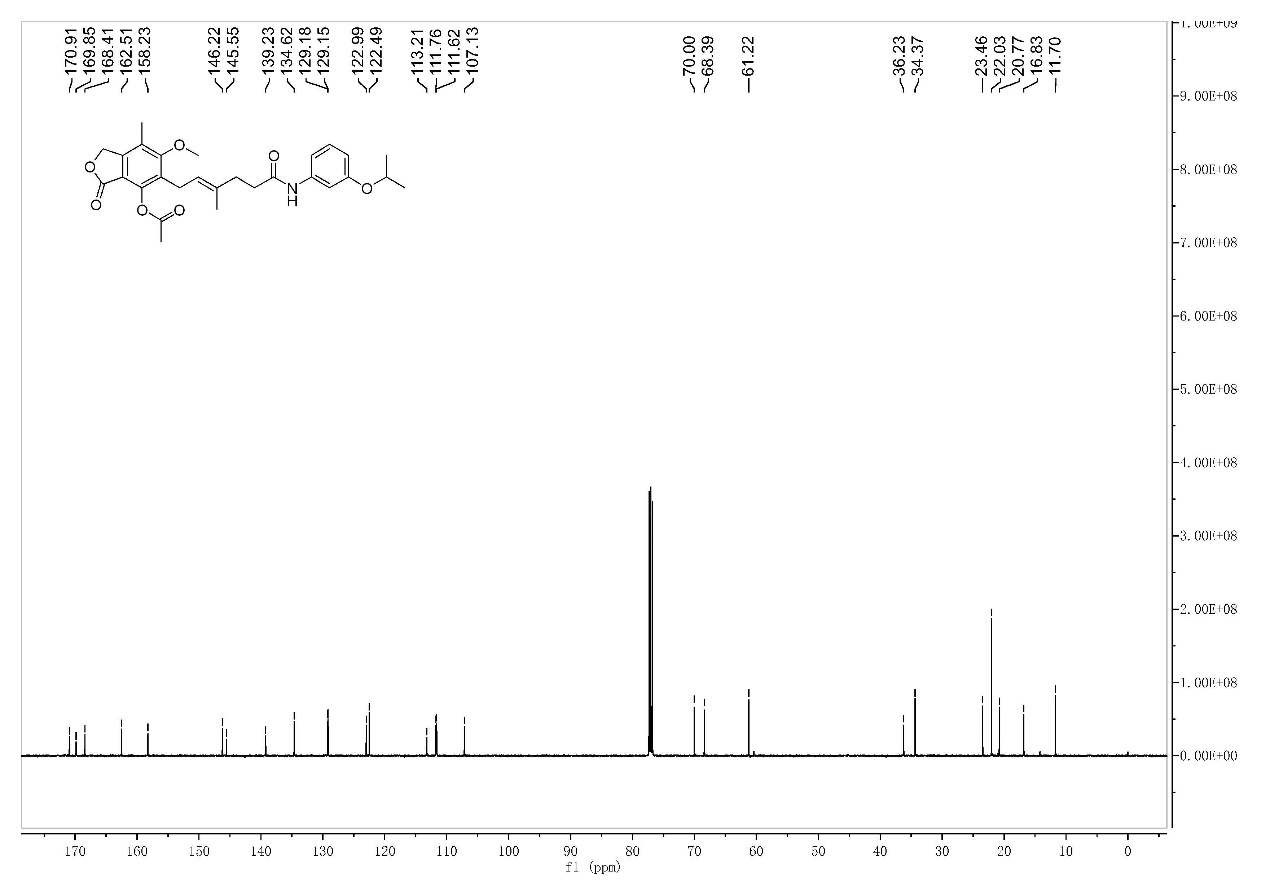


**S10-2** 13C-NMR of the compound **II-5**


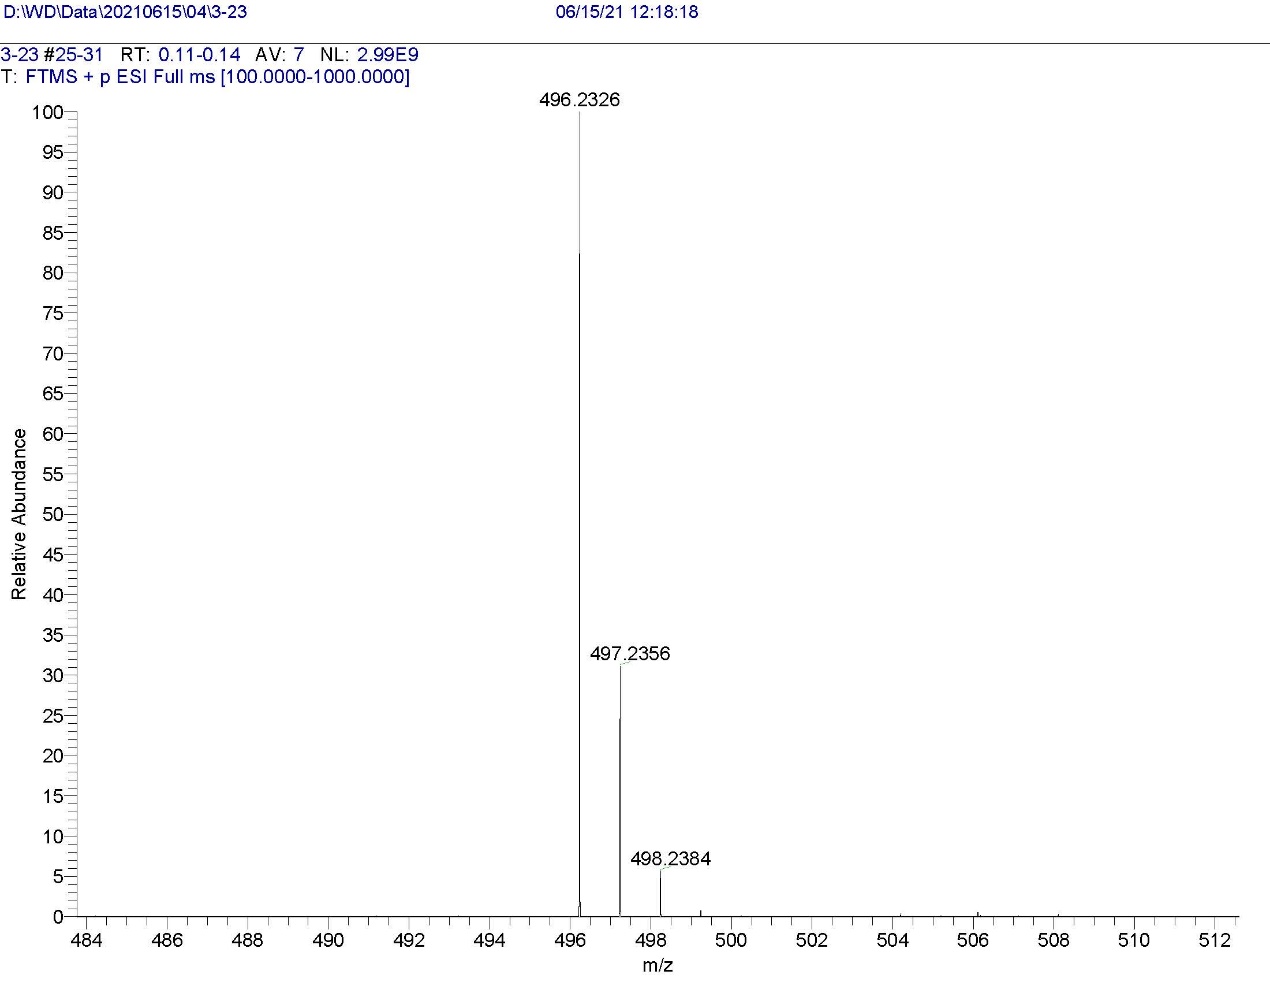


**S10-3** HRMS of the compound **II-5**
